# Supplementary material for: Lessons learnt from the implementation of new models of care delivery through alliance governance in the Southern health region of New Zealand: a qualitative study
Source: PubMed Central journal article supplement — BMJ Open. 2022 Oct 31;12(10):e065635. doi: 10.1136/bmjopen-2022-065635 (PMC9628683; doi:10.1136/bmjopen-2022-065635), 2022-10-31
Supplement: bmjopen-2022-065635.draft_revisions.pdf [file bmjopen-2022-065635.draft_revisions.pdf]

# BMJ Open

BMJ Open is committed to open peer review. As part of this commitment we make the peer review history of every article we publish publicly available.

When an article is published we post the peer reviewers' comments and the authors' responses online. We also post the versions of the paper that were used during peer review. These are the versions that the peer review comments apply to.

The versions of the paper that follow are the versions that were submitted during the peer review process. They are not the versions of record or the final published versions. They should not be cited or distributed as the published version of this manuscript.

BMJ Open is an open access journal and the full, final, typeset and author-corrected version of record of the manuscript is available on our site with no access controls, subscription charges or pay-per-view fees (<http://bmjopen.bmj.com>).

If you have any questions on BMJ Open's open peer review process please email [info.bmjopen@bmj.com](mailto:info.bmjopen@bmj.com)

# BMJ Open

## Lessons learnt from the implementation of new models of care delivery through alliance governance in the Southern health region of New Zealand: A qualitative study

|                               |                                                                                                                                                                                                                                                                                                                                                                                                            |
|-------------------------------|------------------------------------------------------------------------------------------------------------------------------------------------------------------------------------------------------------------------------------------------------------------------------------------------------------------------------------------------------------------------------------------------------------|
| Journal:                      | <i>BMJ Open</i>                                                                                                                                                                                                                                                                                                                                                                                            |
| Manuscript ID                 | bmjopen-2022-065635                                                                                                                                                                                                                                                                                                                                                                                        |
| Article Type:                 | Original research                                                                                                                                                                                                                                                                                                                                                                                          |
| Date Submitted by the Author: | 13-Jun-2022                                                                                                                                                                                                                                                                                                                                                                                                |
| Complete List of Authors:     | Gurung, Gagan ; University of Otago Dunedin School of Medicine, Department of General Practice and Rural Health<br>Jaye, Chrystal; University of Otago Dunedin School of Medicine, Department of General Practice and Rural Health<br>Gauld, Robin; University of Otago Division of Commerce<br>Stokes, Tim; University of Otago Dunedin School of Medicine, Department of General Practice & Rural Health |
| Keywords:                     | Health policy < HEALTH SERVICES ADMINISTRATION & MANAGEMENT, Organisation of health services < HEALTH SERVICES ADMINISTRATION & MANAGEMENT, Organisational development < HEALTH SERVICES ADMINISTRATION & MANAGEMENT, QUALITATIVE RESEARCH                                                                                                                                                                 |
|                               |                                                                                                                                                                                                                                                                                                                                                                                                            |

SCHOLARONE™  
Manuscripts

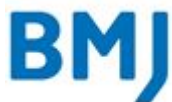

I, the Submitting Author has the right to grant and does grant on behalf of all authors of the Work (as defined in the below author licence), an exclusive licence and/or a non-exclusive licence for contributions from authors who are: i) UK Crown employees; ii) where BMJ has agreed a CC-BY licence shall apply, and/or iii) in accordance with the terms applicable for US Federal Government officers or employees acting as part of their official duties; on a worldwide, perpetual, irrevocable, royalty-free basis to BMJ Publishing Group Ltd ("BMJ") its licensees and where the relevant Journal is co-owned by BMJ to the co-owners of the Journal, to publish the Work in this journal and any other BMJ products and to exploit all rights, as set out in our [licence](#).

The Submitting Author accepts and understands that any supply made under these terms is made by BMJ to the Submitting Author unless you are acting as an employee on behalf of your employer or a postgraduate student of an affiliated institution which is paying any applicable article publishing charge ("APC") for Open Access articles. Where the Submitting Author wishes to make the Work available on an Open Access basis (and intends to pay the relevant APC), the terms of reuse of such Open Access shall be governed by a Creative Commons licence – details of these licences and which [Creative Commons](#) licence will apply to this Work are set out in our licence referred to above.

Other than as permitted in any relevant BMJ Author's Self Archiving Policies, I confirm this Work has not been accepted for publication elsewhere, is not being considered for publication elsewhere and does not duplicate material already published. I confirm all authors consent to publication of this Work and authorise the granting of this licence.

1  
2  
3 **Lessons learnt from the implementation of new models of care**  
4  
5  
6 **delivery through alliance governance in the Southern health region**  
7  
8 **of New Zealand: A qualitative study**  
9  
10

11  
12  
13 Gagan Gurung,<sup>1,3</sup> Chrystal Jaye,<sup>1,4</sup> Robin Gauld,<sup>2,3</sup> Tim Stokes<sup>1,3\*</sup>  
14  
15  
16

17  
18 <sup>1</sup> Department of General Practice and Rural Health, Dunedin School of Medicine,  
19 University of Otago, Dunedin, New Zealand

20  
21 <sup>2</sup> Otago Business School, University of Otago, Dunedin, New Zealand

22  
23 <sup>3</sup> Centre for Health Systems and Technology (CHeST), University of Otago, Dunedin,  
24 New Zealand

25  
26 <sup>4</sup>CARE Research Theme, University of Otago, Dunedin, New Zealand  
27  
28  
29  
30  
31  
32  
33  
34

35  
36 \*Corresponding Author: [tim.stokes@otago.ac.nz](mailto:tim.stokes@otago.ac.nz)

37 Department of General Practice & Rural Health, Dunedin School of Medicine,  
38 University of Otago, PO Box 56, Dunedin 9054, New Zealand  
39  
40  
41  
42  
43  
44  
45  
46  
47

48 **Keywords** Primary and community care, integration, alliance, evaluation, qualitative  
49 research, new models of care, implementation or implementation science  
50  
51  
52  
53  
54  
55  
56  
57  
58  
59  
60

## ABSTRACT

**Objectives:** To explore the process of implementation of the primary and community care strategy (PCCS) (new models of care delivery) through alliance governance in the Southern health region of New Zealand (NZ).

**Design:** Qualitative semi-structured interviews were undertaken. A rapid thematic analysis, informed by implementation science theory: the Consolidated Framework for Implementation Research (CFIR), was conducted.

**Setting:** Southern health region of NZ (Otago and Southland)

**Participants:** Eleven key informants (Alliance Leadership Team members and senior health professionals) who were involved in developing and/or implementation of the strategy

**Results:** The large number of strategy action plans and interdependencies of activities made the implementation of the strategy complex. In the inner setting, communication and relationships between individuals and organisations were identified as an important factor for joint and integrated working. Key elements of a positive implementation climate were not adequately addressed to better align the interests of health providers, and there were multiple competing priorities for the project leaders. A perceived low level of commitment from the leadership of both organisations to joint working and resourcing indicated poor organisational readiness. Gaps in the implementation process included no detailed implementation plan, ambitious targets, poor execution of the plan, the lack of a clear performance monitoring framework and an inadequate feedback mechanism.

**Conclusions:** This study identified factors for the successful implementation of the PCCS using an alliancing approach in Southern NZ. During the evaluation period,

1  
2  
3 wide-ranging NZ health sector reforms were announced. With alliances, partnerships  
4 and networks increasingly held up as models for integration, this evaluation identifies  
5 important lessons for policymakers, managers and services providers both in NZ and  
6 internationally.  
7  
8  
9  
10  
11  
12  
13  
14

15 *Abstract word count: 266*  
16  
17  
18  
19  
20  
21  
22  
23  
24  
25  
26  
27  
28  
29  
30  
31  
32  
33  
34  
35  
36  
37  
38  
39  
40  
41  
42  
43  
44  
45  
46  
47  
48  
49  
50  
51  
52  
53  
54  
55  
56  
57  
58  
59  
60

For peer review only

## STRENGTHS AND LIMITATIONS OF THIS STUDY

- This study contributes to a currently small body of research using implementation science theory (CFIR) to study new models of care delivery using an alliancing governance model.
- The use of the CFIR helped us to illuminate contextual factors and understand the complex interplay between the context and implementation process of the strategy intervention.
- The study's participants had a governance and senior managerial role and were directly involved in developing and/or implementing the PCCS.
- The study was conducted in partnership with the local health system, which was helpful in facilitating the sharing of findings and feedback to the Southern health system.
- Use of a rapid analysis approach was helpful in providing prompt feedback to the local health system, but it might risk missing nuances of data.

## INTRODUCTION

Health systems worldwide and in New Zealand (NZ) are facing a number of challenges, which are likely to intensify in the future.<sup>1 2</sup> A key challenge is the need for better integration and coordination of services.<sup>1-5</sup> Reducing fragmentation and achieving integration is a key response and, in NZ, a goal of recent health policy and system reforms.<sup>1 4 6-8</sup>

A key approach used in NZ at the local health system level from 2013 to 2021 to promote the integration of health care across primary and secondary care was that of alliancing.<sup>9</sup> Alliances bring all key providers within a local health system together in the process of governing health care design and delivery, with a focus on building whole-of-system service designs.<sup>12 13</sup> Derived from the construction industry, this concept has been used in NZ and other countries such as the UK and Australia.<sup>15 16</sup> Alliancing promises a high trust, low bureaucracy way of working between organisations.<sup>15 18</sup> Ideally, members of an alliance should have the capacity to bring resources to the alliance table so decisions can be implemented and to put aside sectoral interest to work collaboratively towards a joint goal and take a whole-of-system approach to planning and decision making.<sup>12 15</sup> The evaluations of past initiatives developed and implemented through an alliance approach in NZ and via similar initiatives (e.g. accountable care organisations in the US and Vanguard programme in the UK) internationally show some promise in terms of improving integration, although it needs to be noted that the health system context in which such initiatives are being implemented is often both complex and changeable.<sup>12 19-21</sup>



1  
2  
3 In the Southern health region of NZ (see Box 1) the Southern District Health Board  
4 (SDHB) and WellSouth Primary Health Organisation (PHO), working together  
5  
6 (SDHB) and WellSouth Primary Health Organisation (PHO), working together  
7  
8 through a formal contractual alliance (Alliance South), developed a Primary and  
9  
10 Community Care Strategy (PCCS) (see box 2) “to do things differently in primary and  
11  
12 community care.”<sup>6</sup> The strategy, launched in 2018, reflected the commitments of the  
13  
14 two alliance partners and priorities for improving primary and community care in the  
15  
16 Southern region.<sup>6</sup> Key action areas for the delivery of the strategy were new models  
17  
18 of care workstreams (e.g. Health Care Home, Home Team, Community Health Hub,  
19  
20 Locality network) and enabling infrastructures (e.g. governance and leadership,  
21  
22 workforce capability and culture, funding and contracting).<sup>6</sup> Implementation of the  
23  
24 PCCS was carried out by Alliance South with joint governance from leaders in both  
25  
26 the SDHB and PHO through the Alliance Leadership Team (ALT).<sup>6</sup>  
27  
28  
29  
30 The strategy’s action plan included establishing a culture of continuous improvement  
31  
32 supported by the monitoring and rapid evaluation of new initiatives.<sup>22</sup>  
33  
34  
35  
36  
37

### Box 1 NZ Southern Health System

The NZ Southern health system comprises a DHB, being the largest geographic region out of 20 DHBs across the country. There is a single PHO in the region. The DHB and PHO serve just over 300000 people with 40% living rurally.<sup>6</sup> The DHB has the overall responsibility for planning and funding in the region and owns public hospitals. The PHO receives funding from the DHB to support primary care and affiliated general practices. The region has two main hospitals and six small regional hospitals.

48  
49  
50 In 2019, the University of Otago and the Alliance South received funding to evaluate  
51  
52 the implementation of the PCCS as a University-Health Sector collaborative project.  
53  
54 This article reports on an evaluation that aimed to explore PCCS implementation at  
55  
56 the alliance governance level. More specifically, the evaluation aimed to identify  
57  
58 facilitators or/and barriers to the successful implementation of the PCCS using a  
59  
60

1  
2  
3 commonly used implementation science theory: the Consolidated Framework for  
4  
5 Implementation Research (CFIR)<sup>10</sup> (see Box 2). This framework has been previously  
6  
7 used to study complex interventions.<sup>17 23</sup>  
8  
9  
10  
11  
12  
13  
14

### Box 2 CFIR

The CFIR is a theoretical framework that provides a structure for identifying facilitators and barriers to implementation.<sup>7 10</sup> It offers a comprehensive, standardised list of constructs that allow researchers to identify variables that are most relevant to a particular intervention. The CFIR comprises five domains: intervention characteristics (eight constructs), outer setting (four constructs), inner setting (five constructs), characteristics of the individuals involved (five constructs) and the process of implementation (four constructs).<sup>10</sup> The CFIR has been widely used to inform qualitative process evaluations across a range of complex interventions, including health care redesign, in health care systems.<sup>17</sup>

## METHODS

### Design, study setting and sampling

Semi-structured interviews were conducted between March 2021 to August 2021 with key informants. These constituted the members of the ALT, including a former senior member of the SDHB involved in commissioning the PCCS and the service project leads of the workstreams (see Box 3). Interviews were conducted either by video conferencing or face-to-face. Interviews varied in length from 30 to 45 minutes.

### Box 3 The PCCS: Vision and strategic goals

The PCCS provides a vision for primary and community care in the Southern health system. It recognises the challenges the health system faces in responding to the changing needs of the community, increasing pressure on the health workforce, and the responsibility to provide equitable access to services across the large and diverse district.

The Strategy and Action Plan have been developed jointly by SDHB and WellSouth, with support from the Community Health Council, University of Otago and others, reflecting their commitment to working together to improve the contribution of primary and community care to the wider Southern health system.

The vision for primary and community care is '*excellent primary and community care that empowers people in our diverse communities to live well, stay well, get well and die well, through integrated ways of working, rapid learning and effective use of technology.*'

The strategy has strategic goals to support the vision focusing on empowering consumers, whanau and communities; integrating care across primary, community and secondary care; and a technology enabled health system.

Key action areas for the delivery of the strategy set out in the action plan were new models of care/workstreams and enabling infrastructures.

Key models of care / workstreams include:

*Health Care Home implementation:* A patient-centred approach which aims to combine the traditional core values of general practice with building the capacity and capability of general practice through the development of new roles, skills, and ways of working.<sup>11</sup>

*Community Health Hubs implementation:* Establishing facilities where secondary outpatient services, advanced primary care services, at least one General Practice operate in the Health Care Home model, diagnostic services and other independent and community based healthcare providers work together in an integrated way.

*Locality Network implementation:* Advisory networks made of health professionals and consumers which help to prioritise and plan health services to better align with the needs of local communities.

*Home Team (Rapid response and enablement service):* A patient centred initiative which aims to help support patients at home via an inter-professional team after leaving the hospital, or a support service at home to avoid to hospital admission. The target group is elderly people.

*Consumer Led Integrated Care:* A programme of care to people with long term conditions using care planning and risk stratification to access more care and provide greater control over managing patient health conditions.<sup>14</sup>

The enabling infrastructures include governance and leadership of the system, health and business intelligence to support planning, funding and delivery; workforce capability and culture; and funding and contracting arrangements to support integrated ways of working.

### Data collection

A semi-structured interview guide (Supplementary file 1) was used for interviews based on the PCCS goals, a literature review and discussion within the research



development or implementation of the strategy (former chair of the ALT, former commissioner of the SDHB, three service project leaders of the workstreams and the executive director for primary and community care strategy).

A number of implementation issues were identified mainly in three CFIR domains: implementation characteristics, implementation context and implementation process (See Box 4).

**Box 4 CFIR domains and constructs.**

**I. Intervention characteristics**

Intervention Source  
Evidence Strength & Quality  
Relative Advantage  
Adaptability  
Trialability

**Complexity**

Design Quality & Packaging  
Cost

**II. Outer setting**

Patient Needs & Resources  
Cosmopolitanism  
Peer Pressure  
External Policy & Incentives

**III. Inner setting**

Structural Characteristics

**Networks & Communications**

**Culture**

**Implementation Climate**

**Readiness for Implementation**

**IV. Characteristics of individuals**

Knowledge & Beliefs about the Intervention  
Self-efficacy  
Individual Stage of Change  
Individual Identification with Organization  
Other Personal Attributes

**V. Implementation Process**

**Planning**

**Engaging**

**Executing**

**Reflecting & Evaluating**

Domains and constructs used in this study are in bold.

## Implementation characteristics

### Complexity

Complexity is defined as the perceived difficulty of implementation, which is reflected by duration, scope, radicalness, disruptiveness and intricacy.<sup>10</sup> Participants considered the PCCS a complex intervention and challenging to implement in a short timeframe. The sheer magnitude of the action plan required the integration of primary and secondary care. Related to this, some objectives in the strategy were less tangible without explicit activities and milestones.

*[The] strategy and action plan is a massive piece of work. ...it took a long time to unpack and figure out exactly who was supposed to be responsible for doing different things within the strategy and action plan, because it had such a massive span. It wasn't just one department, it's like all of primary and community, and then also needed buy-in from secondary to actually make it work. So it was a whole of system approach that required everyone to get on board. (P10)*

Another source of complexity was related to the interdependencies of the regional health context. For example, the successful implementation of the Community Health Hub depended upon the development of the new Dunedin hospital, a significant project located in the regional metropolitan centre. Therefore, for the success of such projects, there was a need to work out the interdependencies, which appeared to be missing from the strategy implementation.

*...if I think about [Community] Health Hubs we've got the things that are going to impact on the success of Health Hubs are outside of the strategy. So things like the development of the new Dunedin hospital, where there is a whole*

1  
2  
3 *stream of work around, what's going to exist outside of the new Dunedin*  
4  
5 *hospital, and what's going to be in an ambulatory care centre and who's*  
6  
7 *responsible for facilitating that is not clear... (P1)*  
8  
9

## 10 **Inner setting**

11  
12  
13  
14 The 'inner setting' is defined as the structural and cultural contexts through which the  
15  
16 implementation process occurs.<sup>10</sup> Networks and communications, culture,  
17  
18 implementation climate and implementation readiness were the constructs identified  
19  
20 in this domain.  
21  
22

### 23 Networks and communications

24  
25  
26 The CFIR defines this construct as the nature and quality of social networks, and the  
27  
28 nature and quality of formal and informal communications within an organisation.  
29  
30 Two sub-themes were identified in this construct: relationships between individuals,  
31  
32 and communication of vision and mission. First, there was a mechanism in place for  
33  
34 the ALT members to meet and communicate regularly. Good working relationships at  
35  
36 all levels were considered an essential factor in implementing the strategy activities  
37  
38 that needed integrated ways of working. However, participants mentioned that  
39  
40 relationships between individuals, especially at the higher level, were problematic.  
41  
42 This was seen as adversely affecting the quality of communication, hampering open  
43  
44 discussion, teamwork, collaboration and feedback. Personalities, personal agenda  
45  
46 and power politics, especially at the senior leadership level, were perceived to be  
47  
48 conflictual, a barrier to relationship building and contributed to a low trust  
49  
50 environment. Participants reflected that conflicts between individuals needed to be  
51  
52 managed or addressed early. Otherwise, this leads to an environment of low or no  
53  
54  
55  
56  
57  
58  
59  
60

1  
2  
3 trust and the whole work programme suffers. Second, participants also mentioned  
4 that expectations and vision were not clearly communicated to the team members.  
5  
6

7  
8 *...the leadership at the DHB and the leadership at the PHO and individuals*  
9 *didn't necessarily have a good working relationship. That would have an*  
10 *impact on how well the Alliance functions, because I guess it's hard for people*  
11 *to speak up and have good constructive conversations if key leaders at the*  
12 *table aren't always behaving in that way. (P7)*  
13  
14  
15  
16  
17  
18  
19

## 20 Culture

21  
22  
23 The CFIR considers culture as a stable, less tangible and socially constructed idea  
24 with the existence of varying definitions. Broadly, it is a given organisation's norms,  
25 values, and basic assumptions.<sup>10</sup> The governance group (ALT) was expected to  
26 facilitate the implementation of the strategy. However, participants highlighted an  
27 existing siloed organisational culture between the DHB and the PHO and between  
28 primary and secondary care providers characterised by a low level of trust and poor  
29 working relationships. The ALT mechanism largely failed to bridge these institutional  
30 silos. The silo mentality did not provide opportunities for joint working, collaboration  
31 and shared decision making. Related to this, the primary and secondary care sectors  
32 had distinct corporate cultures, different scopes of practice and funding models.  
33  
34  
35  
36  
37  
38  
39  
40  
41  
42  
43  
44  
45  
46  
47  
48  
49  
50  
51  
52  
53  
54  
55  
56  
57  
58  
59  
60  
There was no mechanism in place to facilitate the collaboration between these  
sectors.

*Southern health system is pretty dysfunctional in terms of how the two parts of  
the health system [the hospital and primary care] work together. There is very  
little working together between hospital and general practice and community  
care here. That is been historically the case here, and then at the*



1  
2  
3 *management level, it became complex and confrontational. You cannot make*  
4 *a change in a health system unless there is trust and confidence between the*  
5 *players. (P6)*  
6  
7  
8  
9

### 10 Implementation climate

11  
12  
13  
14 This refers to the collective influence of organisations' policies and practices to  
15 promote effective implementation.<sup>29</sup> Key issues around the implementation climate  
16 that were not appropriately addressed were compatibility and relative priority.  
17  
18

19  
20  
21 Regarding compatibility, some of the elements of the strategy appeared to conflict  
22 with the best interests of some health providers. Participants highlighted that there  
23 would be negative financial and workforce implications for general practices if they  
24 were integrated into the community health hub model of care, which aimed to move  
25 care from hospitals to communities. Therefore, there was a need to figure out such  
26 conflicts and competing priorities and align the process to implement the strategy  
27 successfully.  
28  
29  
30  
31  
32  
33  
34  
35  
36  
37

38 *There are different drivers for behaviours which are easy to point out, but*  
39 *given that New Zealand is configured in a model of private enterprise*  
40 *delivering primary care and public sector delivering secondary care how do*  
41 *you create solutions and incentives that recognise those very real needs that*  
42 *are different? We have to recognise that the model needs to address those*  
43 *financial incentives and disincentives in a way that makes it to all players.*  
44  
45  
46  
47  
48  
49  
50

51 *Moving forward in the health system, we have to figure out how we can get*  
52 *processes aligned, recognising there are different competing priorities. (P8)*  
53  
54  
55  
56

57 Regarding the relative priority of this work, key project leaders had to do this  
58 strategic work on top of their day job for the organisation they worked for (DHB or  
59  
60

1  
2  
3 PHO). There were no dedicated resources and team to lead individual projects. If  
4 something important and urgent came up, this had to be prioritised. The impact of  
5 COVID-19 from 2020 also impacted their capacity to make this work a priority. So  
6 overall, PCSS implementation had to take second place to operational matters.  
7  
8  
9

10  
11  
12  
13 *...when things got really busy and other things came over the top like Covid,*  
14 *so often things would get delayed and the implementation of the strategy was*  
15 *nice to do and went on the back burner. (P1)*  
16  
17  
18  
19

## 20 21 Implementation readiness

22  
23 The CFIR defines implementation readiness as an organisational commitment to its  
24 decision to implement an intervention. Two sub-constructs were important here:  
25 leadership engagement, and available resources.<sup>10</sup>  
26  
27  
28  
29

### 30 31 *Leadership*

32  
33 Leadership engagement was about leaders' commitment, involvement, and  
34 accountability for the implementation.<sup>10</sup> We identified leadership commitment and  
35 leadership stability as sub-categories of this construct. Participants perceived that a  
36 high level of commitment was needed from the leadership of both organisations to  
37 resourcing and joint working.  
38  
39  
40  
41  
42  
43  
44  
45

46 Participants highlighted a need for a shared vision and goal, and for all this to  
47 happen, the working relationship of key people in both organisations required expert  
48 relationship facilitation. Participants also felt that regardless of any structures, it was  
49 essential to have influential leaders who could work together, identify and devote  
50 resources and develop trust and confidence.  
51  
52  
53  
54  
55  
56  
57  
58  
59  
60

1  
2  
3           *You don't need an Alliance to implement the primary community care*  
4           *strategy. You don't need a DHB and a PHO to implement the primary*  
5           *community care strategy. What you need is people who are in positions of*  
6           *influence and leadership to agree, work together, pool their resources, develop*  
7           *trust and confidence to do the work. (P6)*

15 Another issue was with leadership stability. With frequent changes in the key  
16 personnel related to strategy implementation, particularly in the DHB, there was a  
17 loss of institutional knowledge and momentum of individual workstreams and overall  
18 strategy implementation, which was frustrating for staff tasked with delivering the  
19 workstreams.  
20  
21

27           *From an implementation perspective, it was incredibly frustrating for people at*  
28           *the grassroots level when there's such a high number of personnel changes*  
29           *at the top and everyone wanted a different way of doing things. I feel like*  
30           *there was a bit of a stumbling block to the implementation. (P10)*

### 37 *Resources*

40 Poor resourcing was a major barrier, as many workstreams were not adequately  
41 resourced. Projects with dedicated resources and a change team were successful in  
42 meeting their objectives. For example, the Health Care Home was relatively  
43 successful with dedicated resources, leadership and project management of the  
44 PHO.<sup>30</sup> In contrast, Community Health Hub and Locality Networks had no such  
45 resource in place and competing priorities, which was reflected in slow progress.  
46  
47 Participants were critical of assumptions that care could be shifted from the  
48 secondary to the primary sector without extra funding and human resources.  
49  
50  
51  
52  
53  
54  
55  
56  
57  
58  
59  
60

1  
2  
3 ...it [the Strategy] generated a lot of expectations and a lot of work, which were  
4 not adequately resourced. What we ended up with was a whole lot of things  
5 on the action plan, which didn't have a lot of resources allocated to them. And  
6 it was to be done on top of your day job type thing. And it became very difficult.  
7  
8  
9  
10  
11  
12 (P2)

13  
14 ... if you stopped doing something in a hospital space, how does the primary  
15 care workforce just do it magically for no extra cost? So in other places in the  
16 country where things that are moving out of the hospital and to the community,  
17 there's a funding stream for that. But trying to get those funding streams in place  
18  
19  
20  
21  
22  
23  
24 in Southern has been so difficult...(P6)

25  
26 The main reason participants offered for poor resourcing was that the ALT team  
27 members representing the SDHB and the PHO could not agree on the distribution  
28 and assignment of available resources.  
29  
30  
31

32  
33 While the ALT was supposed to facilitate SDHB and PHO support for the PCCS  
34 implementation, they had no authority and no mandate for decision-making and  
35 budget/resource allocation so they only could advise instead of directing.  
36  
37  
38  
39

40  
41 *So the Alliance didn't have any authority. They had all authority over being*  
42 *able to advise [as opposed to direct] the PHO and the DHB. So they don't have any*  
43 *formal mandate and they don't have any delegation [delegated authority]. There's no*  
44 *budget, but they do advise us on things in relation to primary community strategy but*  
45 *it wasn't decision-making as such. So it was almost like an extra layer. (P1)*  
46  
47  
48  
49  
50  
51

52  
53 The perceived funding crisis in the health system, with large SDHB budget deficits  
54 and so “no spare money,” also played a role, as did a perceived tension over which  
55 organisation should hold budgetary authority.  
56  
57  
58  
59  
60

## Implementation process

The implementation process includes four interrelated activities essential for successful implementation: planning, engaging, executing, and reflecting and evaluating.<sup>10</sup> During the strategy development, implementation was planned to occur in stages mainly due to the financial cost to the DHB and PHO and associated workforce implications. In hindsight, it was evident that there was not enough preparation to implement the strategy. Participants identified a number of issues across all its four processes, which are discussed below.

### Planning

Participants mentioned that the strategy and its action plan included the list of activities (what components) but lacked details on how to implement the strategy. There was a lack of clarity around roles and responsibilities, mandate and scope in some of the essential components of the strategy (community health hub and Locality networks). There was a strategy and action plan, but participants would have appreciated a detailed implementation plan which provided enough direction for successful execution. A need for a single project management approach with a shared vision and goal was also highlighted.

*...there was no roadmap for implementation. It was only a very high-level set of things in the action plan. (P4)*

*It's [implementation of the strategy] not just like turning on a tap and suddenly everything is in place. We ended up with a strategy, a framework that was to be progressively implemented by Southern DHB and WellSouth. It was a strategy that was always going to be implemented in stages and progressively partly because of financial cost to both the DHB and the WellSouth, but more*

1  
2  
3 *importantly, because of the change in workforce practice that was a*  
4  
5 *consequence of the strategy. (P5)*  
6  
7

## 8 Engagement

9

10  
11 Engaging with implementation leaders, stakeholders and community people,  
12 including vulnerable groups is vital for the successful adoption of the change process  
13 and to ensure the needs and interests of various groups are addressed.<sup>10</sup> The PCCS  
14 required engagement with stakeholders while developing the strategy and its  
15 implementation. As mentioned earlier, the strategy implementation was complex  
16 requiring engagement with multiple stakeholders to get buy-in and ensure successful  
17 implementation.  
18

19  
20 Mixed feelings were expressed about engagement while developing the strategy.  
21 Different stakeholders such as GPs, Māori (iwi groups), the Clinical Council and  
22 community groups across Otago and Southland were consulted. However, a few  
23 participants highlighted that more community consultation could have been  
24 conducted.  
25

26  
27 Participants also perceived that the strategy was not developed by following a  
28 bottom-up process engaging with staff from SDHB and the PHO. It was felt that the  
29 process could have been better with more robust engagement with staff and leaders  
30 of both organisations.  
31

32  
33 *... the primary community care strategy was written with the help of*  
34 *consultants, and so there was an element of it not being really well built from the*  
35 *ground up. (P6)*  
36  
37

## 38 Executing

39  
40  
41  
42  
43  
44  
45  
46  
47  
48  
49  
50  
51  
52  
53  
54  
55  
56  
57  
58  
59  
60

1  
2  
3 This component relates to carrying out or accomplishing the implementation  
4 according to plan. Most of the participants agreed that the strategy's implementation  
5 had not been realised as per the initial vision of the strategy. Overall, they perceived  
6 that except for a few projects, the execution component could have benefitted from  
7 greater planning. As mentioned above, the success of the execution was hampered  
8 by the lack of resources, clarity in scope and structure of the projects and a detailed  
9 implementation plan. Furthermore, the projects' inter-dependencies were not fully  
10 understood at the outset, so the implementation of headline activities (models of  
11 care) remained an isolated effort. As a result, there were variations in the progress of  
12 elements of the action plan. The Health Care Home was seen as having been  
13 successfully implemented. In contrast, with no resources and no detailed plan,  
14 Community Health Hub and Locality Networks implementation progressed slowly.  
15  
16  
17  
18  
19  
20  
21  
22  
23  
24  
25  
26  
27  
28  
29

30  
31 *For the different components, it [execution] is different. You know the Health*  
32 *Care Homes have gone really, really well. Community Health Hub has really*  
33 *struggled. The locality networks need some more energy. (P8)*  
34  
35  
36  
37  
38

39 *It's an ongoing theme in health and in the public sector, which is we've got fantastic*  
40 *ideas and we're good at analysing the problem and we're good at knowing what we*  
41 *need to do, but we're not so good at the implementation piece. (P7)*  
42  
43  
44  
45

#### 46 Reflecting & Evaluating

47

48  
49 Reflection and feedback about the progress and quality of implementation is an  
50 important way to promote shared learning and improvements along the way. There  
51 was good reporting to the Alliance team regarding updates about some workstreams  
52 (primary maternity, Health Care Home, Home Team etc.). However, participants  
53 mentioned that their reports to the broader programme group appeared to be more  
54  
55  
56  
57  
58  
59  
60

1  
2  
3 of a compliance activity rather than an improvement. Participants suggested a need  
4  
5 for an overall quality improvement approach in place for the whole strategy.  
6  
7

8 *There was a lack of an overall quality improvement approach or method. How*  
9  
10 *about using a continuous quality improvement approach across the Alliance*  
11  
12 *structure, down into the individual projects? (P4)*  
13  
14

15  
16 Participants felt that the feedback mechanisms could have been more robust and it  
17  
18 was difficult for them to contribute to decision making at the governance level.  
19

20  
21 *Some of the instruction coming from ALT was a little bit hard to understand.*  
22  
23 *The SIC [Service Improvement Committee] group did feel a little bit unsure about*  
24  
25 *what expectations were or what feedback was required and didn't necessarily feel*  
26  
27 *that they were being heard. (P2)*  
28  
29

30  
31 Participants highlighted that there was a lack of a clear structure and performance  
32  
33 measurement framework to measure and track the progress for many strategy  
34  
35 objectives.  
36

## 37 38 **DISCUSSION**

### 39 40 **Summary of principal findings**

41  
42 Our findings provide insights into the experience of an Alliance and senior health  
43  
44 professionals of the overall implementation of the PCCS which aimed to promote  
45  
46 integration between primary and secondary care. We found that the large number of  
47  
48 strategy action plans and interdependencies of activities made implementation of the  
49  
50 strategy complex. Communication and relationships between individuals and  
51  
52 organisations were identified as an important factor for joint and integrated working,  
53  
54 but needed a more favourable environment than that of the pre-existing  
55  
56  
57  
58  
59  
60



1  
2  
3 organisational silos. Key elements of a positive implementation climate were not  
4  
5 adequately addressed to better align the interests of health providers, and there  
6  
7 were multiple competing priorities for the project leaders. A perceived low level of  
8  
9 commitment from the leadership of both organisations to joint working and  
10  
11 resourcing indicated poor organisational readiness. The combination of no detailed  
12  
13 implementation plan with a single project management approach, ambitious targets,  
14  
15 poorexecution of the plan, the lack of a clear performance monitoring framework,  
16  
17 and an inadequate feedback mechanism demonstrated several gaps in the  
18  
19 implementation process.  
20  
21  
22

### 23 24 **Strength and limitations**

25  
26  
27 We used the CFIR to understand the implementation of the PCCS in the NZ  
28  
29 southern health system context. To our knowledge, our study adds to a small body of  
30  
31 research using implementation science theory (CFIR) to study health system  
32  
33 transformation initiatives focused on integration of health care using an alliancing  
34  
35 governance model. Using the CFIR, the study was able to unpack the black box of  
36  
37 complex relationships between the intervention, its context and the implementation  
38  
39 process.  
40  
41  
42

43  
44 As in other studies,<sup>31-33</sup> the CFIR strengthened the evaluation by offering  
45  
46 comprehensiveness, capturing the dynamics of the implementation process'  
47  
48 complexity, systematising the analysis process and helping to tell the story by  
49  
50 organising and producing rapid actionable evaluation findings. The collaborative  
51  
52 nature of the research was also helpful in facilitating the sharing of findings and  
53  
54 feedback to the Southern health system. We used a rapid analysis approach<sup>25 27 34</sup>  
55  
56 that was helpful in providing prompt feedback to the local health system. The  
57  
58 limitation of using such a rapid approach was that we did not use detailed  
59  
60

1  
2  
3 transcription and a line-by-line open coding process, which might risk missing  
4  
5 nuances of data. However, we did use automated transcriptions generated by Zoom  
6  
7 and listened to audio/video recordings several times to complete field notes and help  
8  
9 categorise participant responses across themes. While the use of the CFIR helped  
10  
11 us to illuminate contextual factors and understand the interplay between the context  
12  
13 and implementation process of the complex strategy intervention, it would be helpful  
14  
15 to identify how different constructs identified by the CFIR interacted to produce  
16  
17 certain outcomes. Although beyond the scope of our study, one possible approach  
18  
19 used previously<sup>35</sup> could be to combine the CFIR with a realist evaluation informed  
20  
21 approach. This would enable CFIR identified constructs to be used to identify  
22  
23 mechanisms for how different contextual conditions generate outcomes.<sup>36</sup>  
24  
25  
26  
27  
28

### 29 **Comparison with existing literature**

30  
31 As in our findings, other studies in the UK and the US on alliancing also highlighted  
32  
33 some of the common facilitators and barriers and lessons learnt.<sup>19 21</sup> Experience of  
34  
35 US Accountable Care Organisations emphasised the importance of having realistic  
36  
37 expectations, finding ways to develop trust, managing conflict and making a  
38  
39 collective decision, and focusing on leadership.<sup>21</sup> Our findings echo previous studies  
40  
41 in the UK about similar health system transformation initiatives, most notably  
42  
43 Vanguard programmes.<sup>19 20 37-39</sup> Vanguards were local pilot sites established across  
44  
45 England to develop and deliver NHS initiated new care models to coordinate care  
46  
47 across primary care, community services and hospitals.<sup>19 20</sup> These studies  
48  
49 highlighted the need for realistic expectations, for local capacity and capability  
50  
51 building, the importance of developing relationships, strong leadership, robust data  
52  
53 and analytics and managing time constraints.<sup>19 20 37-39</sup>  
54  
55  
56  
57  
58  
59  
60

1  
2  
3 In NZ, previous studies into alliancing aimed at integrating primary and secondary  
4 care have also identified factors key to successful implementation.<sup>9 18 23 40</sup> The  
5  
6 Canterbury initiative of delivering integrated health and social care using alliancing  
7  
8 highlighted a number of key enablers: the development of a clear and shared  
9  
10 strategic vision, continuity of senior leadership, staff engagement, a continuous  
11  
12 quality improvement approach and development of new ways of contracting for  
13  
14 health services.<sup>18 40</sup> Another NZ evaluation of pilot initiatives using alliancing to  
15  
16 promote primary and secondary care integration reported overly ambitious plans,  
17  
18 competing priorities, inadequate attention to organisational culture, and lack of timely  
19  
20 funding support as barriers to implementation.<sup>23</sup>  
21  
22  
23  
24  
25

### 26 **Implications for health policy and practice**

27  
28  
29 A number of key lessons and potential solutions useful for future health policy and  
30  
31 practice that have emerged from this implementation evaluation are summarised in  
32  
33 Table 1. While contexts may be different, previous health system transformation  
34  
35 initiatives in NZ and internationally also offer valuable lessons relevant to integrated  
36  
37 care through alliancing.<sup>18</sup> It is noteworthy that while the alliancing approach in the NZ  
38  
39 health sector was initiated more than a decade ago<sup>12 18</sup> the lessons from the  
40  
41 Canterbury initiative have not been fully applied. This suggests a disconnect  
42  
43 between research evidence and its implementation. Hence, attention should be  
44  
45 given to building what is known from research evidence into implementation plans.  
46  
47  
48  
49

50  
51 The NZ government's health sector reforms, enacted in mid-2022, focus on  
52  
53 addressing the health system is facing, including service fragmentation.<sup>8</sup> The  
54  
55 reforms emphasise the need for better integration between primary and secondary  
56  
57 care.<sup>8</sup> The reforms create a single national health service through a new structure  
58  
59 called Health New Zealand and have a greater emphasis on working with local  
60

**Table 1 Key lessons learnt and potential solutions**

| Key findings                                                                                                                                                                               | Potential solutions                                                                                                                                                                                                                                                                         |
|--------------------------------------------------------------------------------------------------------------------------------------------------------------------------------------------|---------------------------------------------------------------------------------------------------------------------------------------------------------------------------------------------------------------------------------------------------------------------------------------------|
| <ul style="list-style-type: none"> <li>The structure put in place (alliancing) itself does not bring about joint working. Relationship building is key.</li> </ul>                         | <ul style="list-style-type: none"> <li>Invest in nurturing and maintaining relationships between individuals and institutions.</li> </ul>                                                                                                                                                   |
| <ul style="list-style-type: none"> <li>An expectation of being able to deliver new models of care without provision of dedicated resources is false.</li> </ul>                            | <ul style="list-style-type: none"> <li>Ensure availability of adequate resourcing and develop agreement regarding the distribution of available resources.</li> </ul>                                                                                                                       |
| <ul style="list-style-type: none"> <li>A committed leadership to resourcing and joint working is important.</li> </ul>                                                                     | <ul style="list-style-type: none"> <li>Ensure a leadership who leads change by sharing common vision and goals, developing teamwork based on trust, relationship and open communication.</li> </ul>                                                                                         |
| <ul style="list-style-type: none"> <li>It is hard for project leaders to lead the strategic work on top of their day job.</li> </ul>                                                       | <ul style="list-style-type: none"> <li>Ensure a dedicated change agent maps out the implementation.</li> </ul>                                                                                                                                                                              |
| <ul style="list-style-type: none"> <li>Lack of detailed plan (clarity around roles and responsibilities and scope) and interdependencies made the implementation roadmap vague.</li> </ul> | <ul style="list-style-type: none"> <li>Acknowledge complexity and that transformation of this kind takes time.</li> <li>Develop a detailed and achievable implementation plan with a clear project management approach.</li> <li>Ensure robust staff and stakeholder engagement.</li> </ul> |
| <ul style="list-style-type: none"> <li>A robust feedback mechanism is needed for quality of implementation and to promote shared learning.</li> </ul>                                      | <ul style="list-style-type: none"> <li>Develop an overall quality improvement approach for the whole strategy and performance measurement framework to track the progress of strategy's objective.</li> </ul>                                                                               |

communities through geographical locality networks with aims of integrating primary and secondary care.<sup>8 41 42</sup> Alliance South had been in abeyance since the announcement of the new health system reforms in April 2021<sup>42</sup> and, at the time of writing, the details of the structure of governance and service delivery at the local level were in development. Regardless of the new configuration of the NZ health



1  
2  
3 Lisa Gestro, Executive Director Strategy, Primary & Community, Southern DHB for  
4  
5 her input during proposal development.  
6  
7

## 8 9 **ETHICS APPROVAL**

10  
11 Ethics approval was obtained from the University of Otago's Human Ethics  
12  
13 Committee (D21/044).  
14  
15

## 16 17 **FUNDING**

18  
19 This study was funded by Health Research South  
20  
21 (<https://www.otago.ac.nz/oms/research/hrs/>) (2018 Health Service Delivery  
22  
23 Research Grant; "Evaluating the Implementation of the Southern Primary Care and  
24  
25 Community Care Strategy" Award/Grant number: N/A).  
26  
27

## 28 29 **CONTRIBUTORSHIP STATEMENT**

30  
31 TS, CJ and GG conceived and designed the study. GG conducted interviews and led  
32  
33 the data analysis with input from TS, CJ and RG. GG, TS and CJ drafted the  
34  
35 manuscript. All authors read, provided critical reviews and approved the final  
36  
37 manuscript. TS is the guarantor.  
38

## 39 40 **COMPETING INTERESTS**

41  
42 All authors declare that they have no competing interests.  
43

## 44 45 **DATA SHARING STATEMENT**

46  
47 Full de-identified interview transcripts will not be shared. Informed consent, in line  
48  
49 with the approving ethics committee, only allows for the use of de-identified extracts  
50  
51 within research reporting and writing to maintain participants' privacy based in a  
52  
53 defined regional area and population, thus making their identification with full  
54  
55 transcripts more likely.  
56  
57  
58  
59  
60

## REFERENCES

1. Cumming J, Dunn P, Middleton L, et al. The health care home in New Zealand: rolling out a new model of primary health care. *Journal of Integrated Care* 2018;26:242-52. doi: 10.1108/JICA-04-2018-0031
2. National Health Board. Trends in service design and new models of care: a review: National Health Board Wellington, 2010.
3. Robertson R, Sonola L, Honeyman M, et al. Specialists in out-of-hospital settings. London: The King's Fund, 2014.
4. Minister of Health. New Zealand Health Strategy: future direction. Wellington: Ministry of Health, 2016.
5. Cumming J, McDonald J, Barr C, et al. New Zealand health system review. Manila: WHO Regional Office for the Western Pacific, 2014.
6. Southern District Health Board & WellSouth Primary Health Network. Southern Primary & Community care strategy. Dunedin, New Zealand: Southern District Health Board & WellSouth Primary Health Network, 2019.
7. Cumming J, Middleton L, Silwal P, et al. Integrated Care in Aotearoa New Zealand 2008–2020. *International Journal of Integrated Care* 2021;21(4)
8. Health and Disability System Review. Health and disability system review - final report– Pūrongo Whakamutunga. Wellington: HDSR, 2020.
9. Akmal A, Gauld R. What components are important for effective healthcare alliance governance? findings from a modified Delphi study in New Zealand. *Health Policy* 2021;125(2):239-45.
10. Damschroder LJ, Aron DC, Keith RE, et al. Fostering implementation of health services research findings into practice: a consolidated framework for advancing implementation science. *Implementation science* 2009;4(1):50.
11. Health Care Home Collaborative. Enhancing the Health Care Home: Model of Care. Wellington: Health Care Home Collaborative, 2020.
12. Gauld R. What should governance for integrated care look like? New Zealand's alliances provide some pointers. *Med J Aust* 2014;201(3 Suppl):S67-68.
13. Tenbensen T, Silwal PR, Walton L, et al. New Zealand's integration-based policy for driving local health system improvement—which conditions underpin more successful implementation? *International Journal of Integrated Care* 2021;21(2): 8. DOI: <http://doi.org/10.5334/ijic.5602>
14. WellSouth Primary Health Network. Client Led Integrated Care (CLIC): WellSouth Primary Health Network. Available from: <https://wellsouth.nz/community/clinical-service/client-led-integrated-care-clic/> accessed May 16 2022.
15. Gauld R. The theory and practice of integrative health care governance. *Journal of Integrated Care* 2017;25(1):61-72. doi: 10.1108/JICA-10-2016-0035
16. Addicott R. Commissioning and contracting for integrated care. London: King's Fund, 2014.
17. Stokes T, Tumilty E, Doolan-Noble F, et al. HealthPathways implementation in a New Zealand health region: a qualitative study using the Consolidated Framework for Implementation Research. *BMJ open* 2018;8(12):e025094.
18. Timmins N, Ham C. The quest for integrated health and social care: a case study in Canterbury, New Zealand. London: The King's Fund, 2013.
19. Maniatopoulos G, Hunter DJ, Erskine J, et al. Lessons learnt from the implementation of new care models in the NHS: a qualitative study of the North East Vanguard programme. *BMJ open* 2019;9(11):e032107.



- 1
  - 2
  - 3
  - 4
  - 5
  - 6
  - 7
  - 8
  - 9
  - 10
  - 11
  - 12
  - 13
  - 14
  - 15
  - 16
  - 17
  - 18
  - 19
  - 20
  - 21
  - 22
  - 23
  - 24
  - 25
  - 26
  - 27
  - 28
  - 29
  - 30
  - 31
  - 32
  - 33
  - 34
  - 35
  - 36
  - 37
  - 38
  - 39
  - 40
  - 41
  - 42
  - 43
  - 44
  - 45
  - 46
  - 47
  - 48
  - 49
  - 50
  - 51
  - 52
  - 53
  - 54
  - 55
  - 56
  - 57
  - 58
  - 59
  - 60
20. Starling A, Foundation H. Implementing new models of care: lessons from the new care models programme in England. *International journal of care coordination* 2018;21(1-2):50-54.
21. Alderwick H, Shortell SM, Briggs AD, et al. Can accountable care organisations really improve the English NHS? Lessons from the United States. *Bmj* 2018;360
22. Southern District Health Board & WellSouth Primary Health Network. Southern Primary & Community Care Action Plan. Dunedin, New Zealand: Southern District Health Board & WellSouth Primary Health Network, 2019.
23. Lovelock K, Martin G, Gauld R, et al. Better, Sooner, More Convenient? The reality of pursuing greater integration between primary and secondary healthcare providers in New Zealand. *SAGE open medicine* 2017;5:2050312117701052.
24. Halcomb EJ, Davidson PM. Is verbatim transcription of interview data always necessary? *Applied nursing research* 2006;19(1):38-42.
25. Graham T, Alderson P, Stokes T. Managing conflicts of interest in the UK National Institute for Health and Care Excellence (NICE) clinical guidelines programme: qualitative study. *PLoS One* 2015;10(3):e0122313.
26. Braun V, Clarke V. Using thematic analysis in psychology. *Qualitative Research in Psychology* 2006;3(2):77-101.
27. Gale RC, Wu J, Erhardt T, et al. Comparison of rapid vs in-depth qualitative analytic methods from a process evaluation of academic detailing in the Veterans Health Administration. *Implementation Science* 2019;14(1):11.
28. Tong A, Sainsbury P, Craig J. Consolidated criteria for reporting qualitative research (COREQ): a 32-item checklist for interviews and focus groups. *International journal for quality in health care : journal of the International Society for Quality in Health Care* 2007;19(6):349-57. doi: 10.1093/intqhc/mzm042
29. Weiner BJ, Belden CM, Bergmire DM, et al. The meaning and measurement of implementation climate. *Implementation Science* 2011;6(1):1-12.
30. Gurung G, Barson S, Haughey M, et al. Health Care Home implementation in Otago and Southland: A qualitative evaluation *Journal of Primary Health Care* 2022;[in Press]
31. Keith RE, Crosson JC, O'Malley AS, et al. Using the Consolidated Framework for Implementation Research (CFIR) to produce actionable findings: a rapid-cycle evaluation approach to improving implementation. *Implementation Science* 2017;12(1):15. doi: 10.1186/s13012-017-0550-7
32. Breimaier HE, Heckemann B, Halfens RJ, et al. The Consolidated Framework for Implementation Research (CFIR): a useful theoretical framework for guiding and evaluating a guideline implementation process in a hospital-based nursing practice. *BMC nursing* 2015;14(1):1-9.
33. Kirk MA, Kelley C, Yankey N, et al. A systematic review of the use of the consolidated framework for implementation research. *Implementation Science* 2015;11(1):1-13.
34. Nixon G, Blattner K, Withington S, et al. Exploring the response to the COVID-19 pandemic at the rural hospital–base hospital interface: experiences of New Zealand rural hospital doctors. *The New Zealand Medical Journal (Online)* 2021;134(1545):11-21.
35. Yakovchenko V, McCullough MB, Smith JL, et al. Implementing a complex psychosocial intervention for unstably housed Veterans: A realist-informed



- 1  
2  
3 evaluation case study. *Implementation Research and Practice*  
4 2021;2:26334895211049483.  
5  
6 36. Pawson R, Tilley N, Tilley N. Realistic evaluation. London: Sage 1997.  
7  
8 37. Imison C, Curry N, Holder H, et al. Shifting the balance of care: great  
9 expectations. London: Nuffield Trust, 2017.  
10  
11 38. Erskine J, Hunter DJ, Small A, et al. Leadership and transformational change in  
12 healthcare organisations: a qualitative analysis of the North East  
13 Transformation System. *Health services management research*  
14 2013;26(1):29-37.  
15  
16 39. Checkland K, Coleman A, Croke S, et al. National evaluation of the Vanguard  
17 new care models programme: report of qualitative case studies:  
18 understanding system change. Manchester, England: University of  
19 Manchester, 2021.  
20  
21 40. Charles A. Developing accountable care systems: Lessons from Canterbury,  
22 New Zealand. London: The King's Fund, 2017.  
23  
24 41. Department of the Prime Minister and Cabinet. Factsheet – Pae Ora (Healthy  
25 Futures) Bill. Weillington: Department of the Prime Minister and Cabinet,  
26 2022.  
27  
28 42. Department of the Prime Minister and Cabinet. Our health and disability system:  
29 Building a stronger health and disability system that delivers for all New  
30 Zealanders. Wellington: Department of the Prime Minister and Cabinet, 2021.  
31  
32  
33  
34  
35  
36  
37  
38  
39  
40  
41  
42  
43  
44  
45  
46  
47  
48  
49  
50  
51  
52  
53  
54  
55  
56  
57  
58  
59  
60

## Interview Topic Guide

- Brief introduction and thank you for your time
- Introduce self
- Highlight specific points from the information sheet:
  - o study details/aims
  - o confidentiality and procedure
- Explanations of the use of study data
- Consent to audio-record
- Collect written consent

### **Areas to explore with the alliance leadership team (ALT) members and service leads**

#### **1) Your role?**

Prompts:

- o What is your current role?
- o How long have you been working in your current role?
- o Your role in primary and community care strategy (PCCS) implementation?
- o Can you tell me how did you become involved with the PCCS?
- o Is there a specific initiative (e.g. individual workstreams) that you are involved with?

#### **2) Understanding of PCCS**

Prompts:

- o What do PCCS initiatives mean to you?
- o What were your expectations of the PCCS initiatives?

#### **3) Governance structure and decision making**

- o What has been your experience of working in/with ALT?
- o How are the two organisations—SDHB and WellSouth PHO—working jointly for PCCS implementation?
- o What is the structure of communication and decision making?
- o How well has the vision and goal of PCCS been communicated to frontline staff?
- o Overall, what is working well, and what is not?

#### **4) Implementation of PCCS**

What are the key areas of focus of PCCS at the governance level?

Prompts:

- How are the supporting activities (enabling structure) implemented to help the implementation of individual workstreams/care models?
- How is ALT supporting the implementation of individual workstreams/care models?
- How satisfied are you with the PCCS implementation process? Please describe.
- What are the good and less good things about the PCCS roll-out process?
- How confident you are that the vision of the PCCS will be realised?
- How are the individual workstreams related?
- What are the impacts of Covid-19 on the implementation of the strategy?
- Overall, what is working well, and what is not?

### **5) Equity**

- What has been done for Māori and other high need groups as part of the strategy implementation?
- How is the governance/ALT team monitoring progress towards equity in PCCS goals and outcomes?

### **6) What do you see as the benefit of the PCSS intervention? Please explain.**

Prompts:

- Could you tell me how you think the PCCS has made a difference in coordination and integration?
- What roles did PCCS play in improving patient experience and equity in outcomes? How?
- To what extent do you think the above changes are the result of actions taken through the strategy?

### **7) Next step**

- Overall, what do you think of the PCCS?
- What should future PCCS initiatives do differently?
- How could the implementation aspects be improved?

### **Conclusion**

Is there anything more you would like to add? Thank you so much for your participation in the interview. Your opinions are very valuable to the study.

## Supplementary File 2

### Consolidated criteria for Reporting Qualitative research (COREQ) 32 item Checklist

Tong A, Sainsbury P, Craig J. Consolidated criteria for reporting qualitative research (COREQ): a 32-item checklist for interviews and focus groups. *International journal for quality in health care* 2007;19(6):349-57.

| Domain                                         | Item number | Comment                                                                                                                                                                                                                                                                | Reported on page number or not applicable (N/A) |
|------------------------------------------------|-------------|------------------------------------------------------------------------------------------------------------------------------------------------------------------------------------------------------------------------------------------------------------------------|-------------------------------------------------|
| <b>Domain 1: Research team and reflexivity</b> |             |                                                                                                                                                                                                                                                                        |                                                 |
| Personal Characteristics                       |             |                                                                                                                                                                                                                                                                        |                                                 |
| Interviewer/facilitator                        | 1           | The Research Fellow (Dr Gagan Gurung) conducted the interviews.                                                                                                                                                                                                        | 7                                               |
| Credentials                                    | 2           | All four research team members have PhD.                                                                                                                                                                                                                               | N/A                                             |
| Occupation                                     | 3           | GG – Research fellow, CJ – Associate professor, RG – professor, TS – professor.                                                                                                                                                                                        | 1                                               |
| Gender                                         | 4           | Three male-identifying and one female-identifying researchers (interviewer, male-identifying).                                                                                                                                                                         | N/A                                             |
| Experience and training                        | 5           | All four research team members have extensive experience in conducting qualitative health research.                                                                                                                                                                    | N/A                                             |
| Relationship with participants                 |             |                                                                                                                                                                                                                                                                        |                                                 |
| Relationship established                       | 6           | It was a collaborative research project between the University and the local health system. Therefore, the research fellow and the broader research team knew some of the participants prior to the research. GG had not met with six participants prior to the study. | N/A                                             |
| Participant knowledge of the interviewer       | 7           | The interviewer introduced himself to participants stating he was a health services researcher, described the research team, its funding, the purpose of the project and answered any questions                                                                        | N/A                                             |

|                                        |    |                                                                                                                                                                              |                      |
|----------------------------------------|----|------------------------------------------------------------------------------------------------------------------------------------------------------------------------------|----------------------|
|                                        |    | participants may have had about the project and those involved in it.                                                                                                        |                      |
| Interviewer characteristics            | 8  | The interviewer was aware of the health system in New Zealand.                                                                                                               | N/A                  |
| <b>Domain 2: study design</b>          |    |                                                                                                                                                                              |                      |
| Theoretical framework                  |    |                                                                                                                                                                              |                      |
| Methodological orientation and Theory  | 9  | Rapid thematic analysis using the CFIR.                                                                                                                                      | 7                    |
| Participant selection                  |    |                                                                                                                                                                              |                      |
| Sampling                               | 10 | Purposive sampling was used.                                                                                                                                                 | 7                    |
| Method of approach                     | 11 | Participants were approached by email.                                                                                                                                       | N/A                  |
| Sample size                            | 12 | Eleven.                                                                                                                                                                      | 8                    |
| Non-participation                      | 13 | Two key informants did not respond to the invitation to participate, however, no person directly declined to take part, nor did anybody drop out once agreeing to take part. | NA                   |
| Setting                                |    |                                                                                                                                                                              |                      |
| Setting of data collection             | 14 | Participants could determine where the interview took place. Nine interviews were conducted by Zoom and two in person in their office.                                       | N/A                  |
| Presence of non-participants           | 15 | None.                                                                                                                                                                        | N/A                  |
| Description of sample                  | 16 | Fully described in the results section.                                                                                                                                      | 8                    |
| Data collection                        |    |                                                                                                                                                                              |                      |
| Interview guide                        | 17 | The interview guide had a number of key questions and potential prompts.                                                                                                     | Supplementary file 1 |
| Repeat interviews                      | 18 | No.                                                                                                                                                                          | NA                   |
| Audio/visual recording                 | 19 | All interviews were audio-recorded.                                                                                                                                          | 7                    |
| Field notes                            | 20 | Yes, following each interview, the interviewer wrote brief field notes covering the participants' main ideas and the interviewer's reflections.                              | 7                    |
| Duration                               | 21 | Interview times varied between 30 to 45 mins.                                                                                                                                | 7                    |
| Data saturation                        | 22 | Not applicable.                                                                                                                                                              | NA                   |
| Transcripts returned                   | 23 | No.                                                                                                                                                                          | NA                   |
| <b>Domain 3: analysis and findings</b> |    |                                                                                                                                                                              |                      |
| Data analysis                          |    |                                                                                                                                                                              |                      |

|                                |    |                                                                                                                           |      |
|--------------------------------|----|---------------------------------------------------------------------------------------------------------------------------|------|
| Number of data coders          | 24 | The interviewer coded the data and codes were discussed regularly with all members of the interview team.                 | 7    |
| Description of the coding tree | 25 | No. However, coding was informed by research questions, interview guides and CFIR.                                        | 7    |
| Derivation of themes           | 26 | The themes were derived from CFIR.                                                                                        | 7    |
| Software                       | 27 | We did not use software to manage data. We used MS word and an excel spreadsheet for coding and analysis.                 | 7    |
| Participant checking           | 28 | No                                                                                                                        | NA   |
| Reporting                      |    |                                                                                                                           |      |
| Quotations presented           | 29 | Yes. Quotations are presented to illustrate findings and identified in a manner protecting participants' confidentiality. | 8-19 |
|                                |    |                                                                                                                           |      |
| Data and findings consistent   | 30 | There was consistency between the data and the findings.                                                                  | 8-19 |
| Clarity of major themes        | 31 | Yes, there is clarity of major themes.                                                                                    |      |
| Clarity of minor themes        | 32 | Yes, minor themes (CFIR constructs) are clearly identified, and they are related to major themes.                         | 8-19 |

# BMJ Open

## Lessons learnt from the implementation of new models of care delivery through alliance governance in the Southern health region of New Zealand: A qualitative study

|                                 |                                                                                                                                                                                                                                                                                                                                                                                                            |
|---------------------------------|------------------------------------------------------------------------------------------------------------------------------------------------------------------------------------------------------------------------------------------------------------------------------------------------------------------------------------------------------------------------------------------------------------|
| Journal:                        | <i>BMJ Open</i>                                                                                                                                                                                                                                                                                                                                                                                            |
| Manuscript ID                   | bmjopen-2022-065635.R1                                                                                                                                                                                                                                                                                                                                                                                     |
| Article Type:                   | Original research                                                                                                                                                                                                                                                                                                                                                                                          |
| Date Submitted by the Author:   | 27-Sep-2022                                                                                                                                                                                                                                                                                                                                                                                                |
| Complete List of Authors:       | Gurung, Gagan ; University of Otago Dunedin School of Medicine, Department of General Practice and Rural Health<br>Jaye, Chrystal; University of Otago Dunedin School of Medicine, Department of General Practice and Rural Health<br>Gauld, Robin; University of Otago Division of Commerce<br>Stokes, Tim; University of Otago Dunedin School of Medicine, Department of General Practice & Rural Health |
| <b>Primary Subject Heading</b>: | Health services research                                                                                                                                                                                                                                                                                                                                                                                   |
| Secondary Subject Heading:      | Health policy, Qualitative research                                                                                                                                                                                                                                                                                                                                                                        |
| Keywords:                       | Health policy < HEALTH SERVICES ADMINISTRATION & MANAGEMENT, Organisation of health services < HEALTH SERVICES ADMINISTRATION & MANAGEMENT, Organisational development < HEALTH SERVICES ADMINISTRATION & MANAGEMENT, QUALITATIVE RESEARCH                                                                                                                                                                 |
|                                 |                                                                                                                                                                                                                                                                                                                                                                                                            |

SCHOLARONE™  
Manuscripts

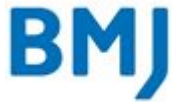

I, the Submitting Author has the right to grant and does grant on behalf of all authors of the Work (as defined in the below author licence), an exclusive licence and/or a non-exclusive licence for contributions from authors who are: i) UK Crown employees; ii) where BMJ has agreed a CC-BY licence shall apply, and/or iii) in accordance with the terms applicable for US Federal Government officers or employees acting as part of their official duties; on a worldwide, perpetual, irrevocable, royalty-free basis to BMJ Publishing Group Ltd ("BMJ") its licensees and where the relevant Journal is co-owned by BMJ to the co-owners of the Journal, to publish the Work in this journal and any other BMJ products and to exploit all rights, as set out in our [licence](#).

The Submitting Author accepts and understands that any supply made under these terms is made by BMJ to the Submitting Author unless you are acting as an employee on behalf of your employer or a postgraduate student of an affiliated institution which is paying any applicable article publishing charge ("APC") for Open Access articles. Where the Submitting Author wishes to make the Work available on an Open Access basis (and intends to pay the relevant APC), the terms of reuse of such Open Access shall be governed by a Creative Commons licence – details of these licences and which [Creative Commons](#) licence will apply to this Work are set out in our licence referred to above.

Other than as permitted in any relevant BMJ Author's Self Archiving Policies, I confirm this Work has not been accepted for publication elsewhere, is not being considered for publication elsewhere and does not duplicate material already published. I confirm all authors consent to publication of this Work and authorise the granting of this licence.



1  
2  
3 **Lessons learnt from the implementation of new models of care**  
4  
5  
6 **delivery through alliance governance in the Southern health region**  
7  
8 **of New Zealand: A qualitative study**  
9  
10

11  
12  
13 Gagan Gurung,<sup>1,3</sup> Chrystal Jaye,<sup>1,4</sup> Robin Gauld,<sup>2,3</sup> Tim Stokes<sup>1,3\*</sup>  
14  
15  
16

17  
18 <sup>1</sup> Department of General Practice and Rural Health, Dunedin School of Medicine,  
19 University of Otago, Dunedin, New Zealand

20  
21 <sup>2</sup> Otago Business School, University of Otago, Dunedin, New Zealand

22  
23 <sup>3</sup> Centre for Health Systems and Technology (CHeST), University of Otago, Dunedin,  
24 New Zealand

25  
26 <sup>4</sup>CARE Research Theme, University of Otago, Dunedin, New Zealand  
27  
28  
29  
30  
31  
32  
33  
34

35 \*Corresponding Author: [tim.stokes@otago.ac.nz](mailto:tim.stokes@otago.ac.nz)

36  
37 Department of General Practice & Rural Health, Dunedin School of Medicine,  
38 University of Otago, PO Box 56, Dunedin 9054, New Zealand  
39  
40  
41  
42  
43  
44  
45  
46  
47

48 **Keywords** Primary and community care, integration, alliance, evaluation, qualitative  
49 research, new models of care, implementation or implementation science  
50  
51  
52  
53  
54  
55  
56  
57  
58  
59  
60

## ABSTRACT

**Objectives:** To explore the process of implementation of the primary and community care strategy (PCCS) (new models of care delivery) through alliance governance in the Southern health region of New Zealand (NZ).

**Design:** Qualitative semi-structured interviews were undertaken. A framework-guided rapid analysis was conducted, informed by implementation science theory - the Consolidated Framework for Implementation Research (CFIR).

**Setting:** Southern health region of NZ (Otago and Southland).

**Participants:** Eleven key informants (Alliance Leadership Team members and senior health professionals) who were involved in the development and/or implementation of the strategy.

**Results:** The large number of strategy action plans and interdependencies of activities made implementation of the strategy complex. In the inner setting, communication and relationships between individuals and organisations were identified as an important factor for joint and integrated working. Key elements of a positive implementation climate were not adequately addressed to better align the interests of health providers, and there were multiple competing priorities for the project leaders. A perceived low level of commitment from the leadership of both organisations to joint working and resourcing indicated poor organisational readiness. Gaps in the implementation process included no detailed implementation plan (reflected in poor execution), ambitious targets, the lack of a clear performance measurement framework and an inadequate feedback mechanism.

**Conclusions:** This study identified factors for the successful implementation of the PCCS using an alliancing approach in Southern NZ. A key enabler is the presence of

1  
2  
3 a stable and committed senior leadership team working through high trust  
4  
5 relationships and open communication across all partner organisations. With  
6  
7 alliances, partnerships and networks increasingly held up as models for integration,  
8  
9 this evaluation identifies important lessons for policymakers, managers and services  
10  
11 providers both in NZ and internationally.  
12  
13  
14  
15  
16

17 *Abstract word count: 281*  
18  
19  
20  
21  
22  
23  
24  
25  
26  
27  
28  
29  
30  
31  
32  
33  
34  
35  
36  
37  
38  
39  
40  
41  
42  
43  
44  
45  
46  
47  
48  
49  
50  
51  
52  
53  
54  
55  
56  
57  
58  
59  
60

## STRENGTHS AND LIMITATIONS OF THIS STUDY

- This study contributes to a currently small body of research using implementation science theory (CFIR) to study new models of care delivery using an alliancing governance model.
- The use of the CFIR helped us to illuminate contextual factors and understand the complex interplay between the context and implementation process of the strategy intervention.
- The study's participants had a governance and senior managerial role and were directly involved in developing and/or implementing the PCCS.
- The study was conducted in partnership with the local health system, which was helpful in facilitating the sharing of findings and feedback to the Southern health system.
- Use of a rapid analysis approach was helpful in providing prompt actionable feedback to the local health system, but it might risk missing nuances of data.

## INTRODUCTION

Health systems worldwide and in New Zealand (NZ) are facing a number of challenges, which are likely to intensify in the future.[1] [2] A pressing challenge is the need for better integration and coordination of services.[1-6] Reducing fragmentation and achieving integration is a key response and, in NZ, a goal of recent health policy and system reforms.[1, 4, 7]

An approach used in NZ at the local health system level from 2013 to 2021 to promote the integration of health care across primary and secondary care was that of alliancing.[8] Alliances bring all key providers within a local health system together in the process of governing health care design and delivery, with a focus on building whole-of-system service designs.[9, 10] Derived from the construction industry, this concept has been used in health care in NZ and other countries such as the UK and Australia.[11, 12] Alliancing promises a high trust, low bureaucracy way of working between organisations.[11, 13] Ideally, members of an alliance should have the capacity to bring resources to the alliance table so decisions can be implemented, and to put aside sectoral interest to work collaboratively towards a joint goal and take a whole-of-system approach to planning and decision making.[9, 11] The evaluations of past initiatives developed and implemented through an alliance approach in NZ and via similar initiatives (e.g. accountable care organisations in the US and Vanguard programme in the UK) internationally show some promise in terms of improving integration, although it needs to be noted that the health system context in which such initiatives are being implemented is often both complex and changeable.[9, 14-16]

1  
2  
3 In the Southern health region of NZ (see Box 1) the Southern District Health Board  
4 (SDHB) and WellSouth Primary Health Organisation (PHO), working together  
5  
6 through a formal contractual alliance (Alliance South), developed a Primary and  
7  
8 Community Care Strategy (PCCS) (see box 2) “to do things differently in primary and  
9  
10 community care.”[17] The strategy, launched in 2018, reflected the commitments of  
11  
12 the two alliance partners and priorities for improving primary and community care in  
13  
14 the Southern region. Priority action areas for the delivery of the strategy were new  
15  
16 models of care workstreams (e.g. Health Care Home, Home Team, Community  
17  
18 Health Hub, Locality network) and enabling infrastructures (e.g. governance and  
19  
20 leadership, workforce capability and culture, funding and contracting).  
21  
22 Implementation of the PCCS was carried out by Alliance South with joint governance  
23  
24 from leaders in both the SDHB and PHO through the Alliance Leadership Team  
25  
26 (ALT). The strategy’s action plan included establishing a culture of continuous  
27  
28 improvement supported by the monitoring and rapid evaluation of new initiatives.[18]  
29  
30  
31  
32  
33  
34  
35  
36  
37

### **Box 1 NZ Southern Health System**

38  
39  
40 During the period of research, the NZ Southern health system comprised a DHB, being the  
41 largest geographic region out of 20 DHBs across the country. There was a single PHO in the  
42 region. The DHB and PHO served just over 300,000 people with 40% living rurally. The DHB  
43 had the overall responsibility for planning and funding in the region and owned public  
44 hospitals. The PHO received funding from the DHB to support primary care and affiliated  
45 general practices. The region has two main hospitals and six small regional hospitals. In mid-  
46 2022, DHBs were disestablished with functions absorbed into a new national body, Health  
47 NZ, as part of major health reforms.  
48  
49  
50  
51  
52  
53  
54  
55  
56  
57  
58  
59  
60

## Box 2 The PCCS: Vision and strategic goals

The PCCS provides a vision for primary and community care in the Southern health system. It recognises the challenges the health system faces in responding to the changing needs of the community, increasing pressure on the health workforce, and the responsibility to provide equitable access to services across the large and diverse district.

The Strategy and Action Plan was developed jointly by SDHB and WellSouth, with support from the Community Health Council, University of Otago and others, reflecting their commitment to working together to improve the contribution of primary and community care to the wider Southern health system.

The vision for primary and community care is '*excellent primary and community care that empowers people in our diverse communities to live well, stay well, get well and die well, through integrated ways of working, rapid learning and effective use of technology.*'

The strategy has strategic goals to support the vision focusing on empowering consumers, whanau and communities; integrating care across primary, community and secondary care; and a technology enabled health system.

Priority action areas for the delivery of the strategy set out in the action plan were new models of care/workstreams and enabling infrastructures.

Key models of care / workstreams include:

*Health Care Home implementation:* A patient-centred approach which aims to combine the traditional core values of general practice with building the capacity and capability of general practice through the development of new roles, skills, and ways of working.

*Community Health Hubs implementation:* Establishing facilities where secondary outpatient services, advanced primary care services, at least one General Practice operate in the Health Care Home model, diagnostic services and other independent and community based healthcare providers work together in an integrated way.

*Locality Network implementation:* Advisory networks made of health professionals and consumers which help to prioritise and plan health services to better align with the needs of local communities.

*Home Team (Rapid response and enablement service):* A patient centred initiative which aims to help support patients at home via an inter-professional team after leaving the hospital, or a support service at home to avoid hospital admission. The target group is elderly people.

*Consumer Led Integrated Care:* A programme of care to people with long term conditions using care planning and risk stratification to access more care and provide greater control over managing patient health conditions.

The enabling infrastructures include governance and leadership of the system, health and business intelligence to support planning, funding and delivery; workforce capability and culture; and funding and contracting arrangements to support integrated ways of working.

In 2019, the University of Otago and the Alliance South received funding to evaluate the implementation of the PCCS as a University-Health Sector collaborative project.

This article reports on an evaluation that aimed to explore PCCS implementation at the alliance governance level. More specifically, the evaluation aimed to identify

1  
2  
3 facilitators or/and barriers to the successful implementation of the PCCS using a  
4  
5 commonly used implementation science theory: the Consolidated Framework for  
6  
7 Implementation Research (CFIR)[19, 20] (see Box 3).  
8  
9  
10  
11  
12

### Box 3 CFIR

The CFIR is a theoretical framework that provides a structure for identifying facilitators and barriers to implementation.[19] It offers a comprehensive, standardised list of constructs that allow researchers to identify variables that are most relevant to a particular intervention. The CFIR comprises five domains: intervention characteristics (eight constructs), outer setting (four constructs), inner setting (five constructs), characteristics of the individuals involved (five constructs) and the process of implementation (four constructs). The CFIR has been widely used to inform qualitative process evaluations across a range of complex interventions, including health care redesign, in health care systems.[20]

## METHODS

### Design, study setting and sampling

This research used qualitative methods within a pragmatic paradigm, which has a focus on producing actionable knowledge.[21] In terms of researcher positionality three members of the research team were academic researchers external to the alliance (GG, TS and CJ), one researcher had previously chaired the alliance ALT (RG). Semi-structured interviews were conducted between March 2021 to August 2021 with key informants who were sampled purposively. These constituted the members of the ALT, including a former senior member of the SDHB involved in commissioning the PCCS and the service project leads of the workstreams (see Box 3). Interviews were conducted either by video conferencing (Zoom) or face-to-face. Interviews varied in length from 30 to 45 minutes. Written informed consent was obtained from all participants.



## Data collection

A semi-structured interview guide (Supplementary file 1) was used for interviews based on the PCCS goals, a literature review and discussion within the research team. The topic guide covered the main areas of governance team focus (structure, capability, and internal relationships), implementation and monitoring of the strategy, perceived impact of the strategy and barriers and facilitators to implementation. Revision and refinement of the topic guide was undertaken as the interviews progressed.

## Data analysis

All interviews (undertaken by GG) were audio and/or video recorded. Field notes for all interviews were taken, which were expanded by listening to the audio recording and reading automatic transcripts obtained from Zoom.[22, 23] We used Gale and colleagues' framework-guided deductive rapid analysis approach,[24] which was specifically developed for use with the CFIR.[24, 25] First, a template summary table was developed in MS Word guided by study research questions and topic guide questions (GG, TS, CJ). This template table was used to summarise individual interview field notes. Next, a matrix in MS Excel by participant type was prepared to chart and consolidate the interview responses in a matrix using the information from the summary table. This process of charting data in a matrix[26] was helpful in comparing and contrasting the findings within an individual interview across the different CFIR domains, constructs and subconstructs and between the different participants. This allowed us to categorise the facilitators and barriers of PCCS implementation.

1  
2  
3 In order to ensure evaluative rigour we used the consolidated criteria for reporting  
4 qualitative research (COREQ)[27] to structure reporting of the methods and the  
5 findings (Supplementary file 2 provides more detail relating to reflexivity, study  
6 design and analysis).  
7  
8  
9  
10  
11  
12

### 13 *Patient and Public Involvement*

14  
15 No patients or the public were involved in the design of this study.  
16  
17  
18  
19

## 20 **RESULTS**

21  
22 We interviewed 11 participants (five female and four male). Five were ALT members  
23 (chief executive of SDHB, chief executive of Well South PHO, Chief Māori Health  
24 Strategy & Improvement Officer, a district Mayor, and a community representative).  
25  
26 Six were other key informants based on their involvement in the development or  
27 implementation of the strategy (former chair of the ALT, former commissioner of the  
28 SDHB, three service project leaders of the workstreams – one from the PHO and two  
29 from the SDHB - and the executive director for the primary and community care  
30 strategy).  
31  
32  
33  
34  
35  
36  
37  
38  
39  
40

41 A number of implementation issues were identified in three CFIR domains  
42 (Supplementary file 3): intervention characteristics, inner setting and implementation  
43 process (See Box 4).  
44  
45  
46  
47  
48  
49  
50  
51  
52  
53  
54  
55  
56  
57  
58  
59  
60

**Box 4 CFIR domains and constructs.****I. Intervention characteristics**

Intervention Source  
 Evidence Strength & Quality  
 Relative Advantage  
 Adaptability  
 Trialability

**Complexity**

Design Quality & Packaging  
 Cost

**II. Outer setting**

Patient Needs & Resources  
 Cosmopolitanism  
 Peer Pressure  
 External Policy & Incentives

**III. Inner setting**

Structural Characteristics

**Networks & Communications****Culture****Implementation Climate****Readiness for Implementation****IV. Characteristics of individuals**

Knowledge & Beliefs about the Intervention  
 Self-efficacy  
 Individual Stage of Change  
 Individual Identification with Organization  
 Other Personal Attributes

**V. Implementation Process****Planning****Engaging****Executing****Reflecting & Evaluating**

*Domains and constructs used in this study are in bold.*

**Implementation characteristics**Complexity

Complexity is defined as the perceived difficulty of implementation, which is reflected by duration, scope, radicalness, disruptiveness and intricacy.[19] Participants

1  
2  
3 considered the PCCS a complex intervention and challenging to implement in a short  
4  
5 timeframe. The sheer magnitude of the action plan required the integration of  
6  
7 primary and secondary care. Related to this, some objectives in the strategy were  
8  
9 less tangible without explicit activities and milestones.  
10  
11

12  
13 *[The] strategy and action plan is a massive piece of work. ...it took a long time*  
14  
15 *to unpack and figure out exactly who was supposed to be responsible for*  
16  
17 *doing different things within the strategy and action plan, because it had such*  
18  
19 *a massive span. It wasn't just one department, it's like all of primary and*  
20  
21 *community, and then also needed buy-in from secondary to actually make it*  
22  
23 *work. So it was a whole of system approach that required everyone to get on*  
24  
25 *board. (P10)*  
26  
27  
28  
29

30 Another source of complexity was related to the interdependencies of the regional  
31  
32 health context. For example, the successful implementation of the Community Health  
33  
34 Hub depended upon the development of the new Dunedin hospital, a significant  
35  
36 project located in the regional metropolitan centre. Therefore, for the success of such  
37  
38 projects, there was a need to work out the interdependencies, which appeared to be  
39  
40 missing from the strategy implementation.  
41  
42  
43

44 *...if I think about [Community] Health Hubs we've got the things that are going*  
45  
46 *to impact on the success of Health Hubs are outside of the strategy. So things*  
47  
48 *like the development of the new Dunedin hospital, where there is a whole*  
49  
50 *stream of work around, what's going to exist outside of the new Dunedin*  
51  
52 *hospital, and what's going to be in an ambulatory care centre and who's*  
53  
54 *responsible for facilitating that is not clear... (P1)*  
55  
56  
57  
58  
59  
60

## Inner setting

The 'inner setting' is defined as the structural and cultural contexts through which the implementation process occurs.[19] Networks and communications, culture, implementation climate and implementation readiness were the constructs identified in this domain.

### Networks and communications

The CFIR defines this construct as the nature and quality of social networks, and the nature and quality of formal and informal communications within an organisation.[19] Two sub-themes were identified in this construct: relationships between individuals, and communication of vision and mission. First, there was a mechanism in place for the ALT members to meet and communicate regularly. Good working relationships at all levels were considered an essential factor in implementing the strategy activities that needed integrated ways of working. However, participants mentioned that relationships between individuals, especially at the higher level, were problematic. This was seen as adversely affecting the quality of communication, hampering open discussion, teamwork, collaboration and feedback. Personalities, personal agenda and power politics, especially at the senior leadership level, were perceived to be conflictual, a barrier to relationship building and contributed to a low trust environment. Participants reflected that conflicts between individuals needed to be managed or addressed early. Otherwise, this leads to an environment of low or no trust and the whole work programme suffers. Second, participants also mentioned that expectations and vision were not clearly communicated to the team members.

*...the leadership at the DHB and the leadership at the PHO and individuals didn't necessarily have a good working relationship. That would have an*

1  
2  
3 *impact on how well the Alliance functions, because I guess it's hard for people*  
4 *to speak up and have good constructive conversations if key leaders at the*  
5 *table aren't always behaving in that way. (P7)*  
6  
7  
8  
9

## 10 Culture

11  
12  
13 The CFIR considers culture as a stable, less tangible and socially constructed idea  
14 with the existence of varying definitions. Broadly, it is a given organisation's norms,  
15 values, and basic assumptions.[19] The governance group (ALT) was expected to  
16 facilitate the implementation of the strategy. However, participants highlighted an  
17 existing siloed organisational culture between the DHB and the PHO and between  
18 primary and secondary care providers characterised by a low level of trust and poor  
19 working relationships. The ALT mechanism largely failed to bridge these institutional  
20 silos. The silo mentality was not conducive to joint working, collaboration and shared  
21 decision making. Related to this, the primary and secondary care sectors had distinct  
22 corporate cultures, different scopes of practice and funding models. There was no  
23 mechanism in place to facilitate the collaboration between these sectors.  
24  
25  
26  
27  
28  
29  
30  
31  
32  
33  
34  
35  
36  
37  
38  
39

40 *Southern health system is pretty dysfunctional in terms of how the two parts of*  
41 *the health system [the hospital and primary care] work together. There is very*  
42 *little working together between hospital and general practice and community*  
43 *care here. That is been historically the case here, and then at the*  
44 *management level, it became complex and confrontational. You cannot make*  
45 *a change in a health system unless there is trust and confidence between the*  
46 *players. (P6)*  
47  
48  
49  
50  
51  
52  
53  
54  
55

## 56 Implementation climate

1  
2  
3 This refers to the collective influence of organisations' policies and practices to  
4 promote effective implementation.[28] Important issues around the implementation  
5 climate that were not appropriately addressed were compatibility and relative priority.  
6  
7  
8  
9

10 Regarding compatibility, some of the elements of the strategy appeared to conflict  
11 with the best interests of some health providers. Participants highlighted that there  
12 would be negative financial and workforce implications for general practices if they  
13 were integrated into the community health hub model of care, which aimed to move  
14 care from hospitals to communities. Therefore, there was a need to identify and  
15 manage such conflicts and competing priorities..  
16  
17  
18  
19  
20  
21  
22  
23

24  
25 *There are different drivers for behaviours which are easy to point out, but*  
26 *given that New Zealand is configured in a model of private enterprise*  
27 *delivering primary care and public sector delivering secondary care how do*  
28 *you create solutions and incentives that recognise those very real needs that*  
29 *are different? We have to recognise that the model needs to address those*  
30 *financial incentives and disincentives in a way that makes it to all players.*  
31  
32 *Moving forward in the health system, we have to figure out how we can get*  
33 *processes aligned, recognising there are different competing priorities. (P8)*  
34  
35  
36  
37  
38  
39  
40  
41  
42  
43

44 Regarding the relative priority of this work, the project leaders had to do this strategic  
45 work on top of their day job for the organisation they worked for (DHB or PHO).

46 There were no dedicated resources and team to lead individual projects. If  
47 something important and urgent came up, this had to be prioritised. The impact of  
48 COVID-19 from 2020 also impacted their capacity to make this work a priority.

49 PCSS implementation had to take second place to operational matters.  
50  
51  
52  
53  
54  
55  
56  
57  
58  
59  
60

1  
2  
3           *...when things got really busy and other things came over the top like Covid,*  
4  
5           *so often things would get delayed and the implementation of the strategy was*  
6  
7           *nice to do and went on the back burner. (P1)*  
8  
9

### 10 Implementation readiness

11  
12  
13  
14 The CFIR defines implementation readiness as an organisational commitment to its  
15  
16 decision to implement an intervention. Two sub-constructs were important here:  
17  
18 leadership engagement, and available resources.[19]  
19  
20

#### 21 *Leadership*

22  
23  
24 Leadership engagement was about leaders' commitment, involvement, and  
25  
26 accountability for the implementation.[19] We identified leadership commitment and  
27  
28 leadership stability as sub-categories of this construct. Participants perceived that a  
29  
30 high level of commitment was needed from the leadership of both organisations to  
31  
32 resourcing and joint working.  
33  
34

35  
36 Participants highlighted a need for a shared vision and goal, and for this to happen,  
37  
38 the working relationship of key people in both organisations required expert  
39  
40 relationship facilitation. Participants also felt that regardless of organisational  
41  
42 structure, it was essential to have influential leaders who could work together,  
43  
44 identify and devote resources and develop trust and confidence.  
45  
46  
47

48           *You don't need an Alliance to implement the primary community care*  
49  
50           *strategy. You don't need a DHB and a PHO to implement the primary*  
51  
52           *community care strategy. What you need is people who are in positions of*  
53  
54           *influence and leadership to agree, work together, pool their resources,*  
55  
56           *develop trust and confidence to do the work. (P6)*  
57  
58  
59  
60



1  
2  
3 Another issue was with leadership stability. With frequent changes in the key  
4  
5 personnel related to strategy implementation, particularly in the DHB, there was a  
6  
7 loss of institutional knowledge and momentum of individual workstreams and overall  
8  
9 strategy implementation, which was frustrating for staff tasked with delivering the  
10  
11 workstreams.  
12  
13

14  
15 *From an implementation perspective, it was incredibly frustrating for people at*  
16  
17 *the grassroots level when there's such a high number of personnel changes*  
18  
19 *at the top and everyone wanted a different way of doing things. I feel like*  
20  
21 *there was a bit of a stumbling block to the implementation. (P10)*  
22  
23

#### 24 25 *Resources*

26  
27  
28 Poor resourcing was a major barrier, as many workstreams were not adequately  
29  
30 resourced. Projects with dedicated resources and a change team were successful in  
31  
32 meeting their objectives. For example, the Health Care Home was relatively  
33  
34 successful with dedicated resources, leadership and project management of the  
35  
36 PHO.[29] In contrast, the Community Health Hub and Locality Networks had no such  
37  
38 resource in place and competing priorities, which was reflected in slow progress.  
39  
40 Participants were critical of assumptions that care could be shifted from the  
41  
42 secondary to the primary sector without extra funding and human resources.  
43  
44  
45

46  
47 *...it [the Strategy] generated a lot of expectations and a lot of work, which were*  
48  
49 *not adequately resourced. What we ended up with was a whole lot of things*  
50  
51 *on the action plan, which didn't have a lot of resources allocated to them. And*  
52  
53 *it was to be done on top of your day job type thing. And it became very difficult.*  
54  
55  
56 *(P2)*  
57  
58  
59  
60

1  
2  
3 ... if you stopped doing something in a hospital space, how does the primary  
4 care workforce just do it magically for no extra cost? So in other places in the  
5 country where things that are moving out of the hospital and to the community,  
6 there's a funding stream for that. But trying to get those funding streams in place  
7 in Southern has been so difficult...(P6)  
8  
9  
10  
11  
12  
13

14 The main reason participants offered for poor resourcing was that the ALT team  
15 members representing the SDHB and the PHO could not agree on the distribution  
16 and assignment of available resources.  
17  
18  
19  
20  
21

22 While the ALT was supposed to facilitate SDHB and PHO support for the PCCS  
23 implementation, they had no authority and no mandate for decision-making and  
24 budget/resource allocation so they only could advise instead of directing.  
25  
26  
27  
28  
29

30 *So the Alliance didn't have any authority. They had all authority over being*  
31 *able to advise [as opposed to direct] the PHO and the DHB. So they don't have any*  
32 *formal mandate and they don't have any delegation [delegated authority]. There's no*  
33 *budget, but they do advise us on things in relation to primary community strategy but*  
34 *it wasn't decision-making as such. So it was almost like an extra layer. (P1)*  
35  
36  
37  
38  
39  
40  
41

42 The perceived funding crisis in the health system, with large SDHB budget deficits  
43 and "no spare money," also played a role, as did a perceived tension over which  
44 organisation should hold budgetary authority.  
45  
46  
47  
48  
49

### 50 **Implementation process**

51  
52 The implementation process includes four interrelated activities essential for  
53 successful implementation: planning, engaging, executing, and reflecting and  
54 evaluating.[19] During the strategy development, implementation was planned to  
55 occur in stages mainly due to the financial cost to the DHB and PHO and associated  
56  
57  
58  
59  
60

1  
2  
3 workforce implications. In hindsight, it was evident that there was not enough  
4 preparation to implement the strategy. Participants identified a number of issues  
5  
6 across all four processes, which are discussed below.  
7  
8  
9

## 10 Planning

11  
12  
13 Participants mentioned that the strategy and its action plan included the list of  
14 activities (what components) but lacked details on how to implement the strategy.  
15  
16 There was a lack of clarity around roles and responsibilities, mandate and scope in  
17 some of the essential components of the strategy (community health hub and  
18 Locality networks). There was a strategy and action plan, but a detailed  
19 implementation plan which provided enough direction for the execution of the  
20 strategy implementation was lacking. A need for a single project management  
21 approach with a shared vision and goal was also highlighted.  
22  
23  
24  
25  
26  
27  
28  
29  
30  
31  
32

33 *...there was no roadmap for implementation. It was only a very high-level set*  
34 *of things in the action plan. (P4)*  
35  
36  
37

38 *It's [implementation of the strategy] not just like turning on a tap and suddenly*  
39 *everything is in place. We ended up with a strategy, a framework that was to*  
40 *be progressively implemented by Southern DHB and WellSouth. It was a*  
41 *strategy that was always going to be implemented in stages and progressively*  
42 *partly because of financial cost to both the DHB and the WellSouth, but more*  
43 *importantly, because of the change in workforce practice that was a*  
44 *consequence of the strategy. (P5)*  
45  
46  
47  
48  
49  
50  
51  
52  
53

## 54 Engagement

55  
56  
57 Engaging with implementation leaders, stakeholders and community people,  
58 including vulnerable groups is vital for the successful adoption of the change process  
59  
60

1  
2  
3 and to ensure the needs and interests of various groups are addressed.[19] The  
4  
5 PCCS required engagement with stakeholders while developing the strategy and its  
6  
7 implementation. As mentioned earlier, the strategy implementation was complex  
8  
9 requiring engagement with multiple stakeholders to secure buy-in and ensure  
10  
11 successful implementation.  
12  
13

14  
15 Mixed feelings were expressed about engagement while developing the strategy.  
16  
17 Different stakeholders such as GPs, Māori (iwi groups), the Clinical Council and  
18  
19 community groups across Otago and Southland were consulted. However, a few  
20  
21 participants highlighted that a broader range of community groups could have been  
22  
23 consulted.  
24  
25

26  
27 Participants also perceived that the strategy was not developed by following a  
28  
29 bottom-up process engaging with staff from SDHB and the PHO. It was felt that the  
30  
31 process could have been better with more robust engagement with staff and leaders  
32  
33 of both organisations.  
34  
35

36  
37 *... the primary community care strategy was written with the help of*  
38  
39 *consultants, and so there was an element of it not being really well built from the*  
40  
41 *ground up. (P6)*  
42  
43

#### 44 45 Executing

46  
47 This component relates to carrying out or accomplishing the implementation  
48  
49 according to plan. Most of the participants agreed that the strategy's implementation  
50  
51 had not been realised as per the initial vision of the strategy. Overall, they perceived  
52  
53 that except for a few projects, the execution component could have benefitted from  
54  
55 greater planning. As mentioned above, the success of the execution was hampered  
56  
57 by the lack of resources, clarity in scope and structure of the projects and a detailed  
58  
59  
60

1  
2  
3 implementation plan. Furthermore, the projects' inter-dependencies were not fully  
4  
5 understood at the outset, so the implementation of headline activities (models of  
6  
7 care) remained an isolated effort. As a result, there were variations in the progress of  
8  
9 elements of the action plan. The Health Care Home was seen as having been  
10  
11 successfully implemented. In contrast, with no resources and no detailed plan,  
12  
13 Community Health Hub and Locality Networks implementation progressed slowly.  
14  
15

16  
17 *For the different components, it [execution] is different. You know the Health*  
18  
19 *Care Homes have gone really, really well. Community Health Hub has really*  
20  
21 *struggled. The locality networks need some more energy. (P8)*  
22  
23

24  
25 *It's an ongoing theme in health and in the public sector, which is we've got fantastic*  
26  
27 *ideas and we're good at analysing the problem and we're good at knowing what we*  
28  
29 *need to do, but we're not so good at the implementation piece. (P7)*  
30  
31

### 32 Reflecting & Evaluating

33  
34  
35 Reflection and feedback about the progress and quality of implementation is an  
36  
37 important way to promote shared learning and improvements along the way. There  
38  
39 was good reporting to the Alliance team regarding updates about some workstreams  
40  
41 (primary maternity, Health Care Home, Home Team etc.). However, participants  
42  
43 mentioned that their reports to the broader programme group appeared to be more  
44  
45 of a compliance activity rather than an improvement. Participants suggested a need  
46  
47 for an overall quality improvement approach in place for the whole strategy.  
48  
49  
50

51  
52 *There was a lack of an overall quality improvement approach or method. How*  
53  
54 *about using a continuous quality improvement approach across the Alliance*  
55  
56 *structure, down into the individual projects? (P4)*  
57  
58  
59  
60

1  
2  
3 Participants felt that the feedback mechanisms could have been more robust, and it  
4 was difficult for them to contribute to decision making at the governance level.  
5  
6  
7

8 *Some of the instruction coming from ALT was a little bit hard to understand.*  
9  
10 *The SIC [Service Improvement Committee] group did feel a little bit unsure about*  
11 *what expectations were or what feedback was required and didn't necessarily feel*  
12 *that they were being heard. (P2)*  
13  
14  
15  
16  
17

18 Participants highlighted that there was a lack of a clear structure and performance  
19 measurement framework to measure and track the progress for many strategy  
20 objectives.  
21  
22  
23  
24

## 25 **DISCUSSION**

### 26 **Summary of findings**

27  
28  
29  
30  
31 Our findings provide insights into the experience of an Alliance and senior health  
32 professionals of the overall implementation of the PCCS which aimed to promote  
33 integration between primary and secondary care. We found that the large number of  
34 strategy action plans and interdependencies of activities made implementation of the  
35 strategy complex. Communication and relationships between individuals and  
36 organisations were identified as an important factor for joint and integrated working,  
37 but needed a more favourable environment than that of the pre-existing  
38 organisational silos. Essential elements of a positive implementation climate were  
39 not adequately addressed to better align the interests of health providers, and there  
40 were multiple competing priorities for the project leaders. A perceived low level of  
41 commitment from the leadership of both organisations to joint working and  
42 resourcing indicated poor organisational readiness. The combination of no detailed  
43 implementation plan with a single project management approach, ambitious targets,  
44  
45  
46  
47  
48  
49  
50  
51  
52  
53  
54  
55  
56  
57  
58  
59  
60

1  
2  
3 the lack of a clear performance measurement framework, and an inadequate  
4  
5 feedback mechanism demonstrated several gaps in the implementation process and  
6  
7 resulted in poor execution of the strategy.  
8  
9

### 10 **Strength and limitations**

11  
12  
13 The use of the CFIR strengthened the evaluation by offering comprehensiveness,  
14  
15 capturing the dynamics of the implementation process' complexity, systematising the  
16  
17 analysis process and helping to tell the story by organising and producing rapid  
18  
19 actionable evaluation findings.[20, 30, 31] The collaborative nature of the research  
20  
21 was also helpful in facilitating the sharing of findings and feedback to the Southern  
22  
23 health system. We further used a rapid analysis approach[23-25, 32] that was both  
24  
25 efficient in terms of researcher resources[25] and allowed us to provide prompt  
26  
27 feedback to the local health system in line with our aim to provide actionable  
28  
29 knowledge. A limitation of using such a rapid approach was that we did not use  
30  
31 detailed transcription and line-by-line open coding process, which might risk missing  
32  
33 nuances of data. A further potential limitation of our approach is that we did not  
34  
35 formally feedback our findings to each participant (respondent validation).  
36  
37  
38

39  
40  
41 Nonetheless, we shared our preliminary findings in periodic colloquiums targeted to  
42  
43 participants from the Southern health system and the feedback we received was that  
44  
45 they “made sense” to participants.  
46  
47

48  
49 While the use of the CFIR helped us to illuminate contextual factors and understand  
50  
51 the interplay between the context and implementation process of the complex  
52  
53 strategy intervention, it would be helpful to identify how different constructs identified  
54  
55 by the CFIR interacted to produce certain outcomes. A further issue is that  
56  
57 “complexity” as used by the CFIR is defined through an implementation science  
58  
59 framework as a complex (complicated) intervention; this is different from the way  
60

1  
2  
3 “complexity” is framed in health systems research that uses complexity theory.[33] In  
4  
5 this regard, the way CFIR structures its implementation process constructs (from  
6  
7 planning to evaluating) is also linear, though CFIR’s developers acknowledge the  
8  
9 process may follow a nonlinear course.[19] Although beyond the scope of our study,  
10  
11 one possible future approach could be to combine the CFIR with a realist informed  
12  
13 evaluation.[34] This would enable CFIR identified constructs to be used to identify  
14  
15 mechanisms for how different contextual conditions generate outcomes.[35] It is  
16  
17 interesting to note that our analysis does suggest underlying mechanisms (e.g., lack  
18  
19 of trust, poor leadership) that impact negatively on achieving the desired outcome of  
20  
21 PCCS implementation.  
22  
23  
24  
25

### 26 **Comparison with existing literature**

27  
28  
29 We used the CFIR to understand the implementation of the PCCS in the NZ  
30  
31 southern health system context. Our study adds to a small body of research using  
32  
33 implementation science theory (CFIR) to study health system transformation  
34  
35 initiatives.[20, 36, 37] [38] Using the CFIR, the study was able to unpack the black  
36  
37 box of complex relationships between the intervention, its context and the  
38  
39 implementation process.  
40  
41  
42  
43

44 Our study also adds to the body of NZ health services research addressing what  
45  
46 conditions underpin successful implementation of integrated care. Previous studies  
47  
48 into alliancing aimed at integrating primary and secondary care have also identified  
49  
50 the issues reported here as being key to implementation success.[8, 10, 13, 38, 39]  
51  
52  
53 The Canterbury initiative of delivering integrated health and social care using  
54  
55 alliancing highlighted a number of key enablers: the development of a clear and  
56  
57 shared strategic vision, continuity of senior leadership, staff engagement, a  
58  
59 continuous quality improvement approach and development of new ways of  
60



1  
2  
3 contracting for health services.[13, 39] Another NZ evaluation of pilot initiatives using  
4  
5 alliancing to promote primary and secondary care integration reported overly  
6  
7 ambitious plans, competing priorities, inadequate attention to organisational culture,  
8  
9 and lack of timely funding support as barriers to implementation.[38] Similarly, an  
10  
11 evaluation of the system level measures (SLM) framework found that the strength of  
12  
13 formal and informal organisational relationships at the local level were critical  
14  
15 conditions for implementation success.[10]  
16  
17

18  
19 The findings are also consistent with the international literature on alliancing.[14, 16]  
20  
21 Experience of US Accountable Care Organisations emphasised the importance of  
22  
23 having realistic expectations, finding ways to develop trust, managing conflict and  
24  
25 making a collective decision, and focusing on leadership.[16] Our findings echo  
26  
27 previous studies in the UK about similar health system transformation initiatives,  
28  
29 most notably Vanguard programmes.[14, 15, 40-42] Vanguards were local pilot sites  
30  
31 established across England to develop and deliver NHS initiated new care models to  
32  
33 coordinate care across primary care, community services and hospitals.[14, 15]  
34  
35 These studies highlighted the need for realistic expectations, for local capacity and  
36  
37 capability building, the importance of developing relationships, strong leadership,  
38  
39 robust data and analytics and managing time constraints.[14, 15, 40-42]  
40  
41  
42  
43  
44

### 45 **Implications for health policy and practice**

46  
47  
48 A number of important lessons and potential solutions useful for future health policy  
49  
50 and practice that have emerged from this implementation evaluation are summarised  
51  
52 in Table 1.  
53  
54  
55  
56  
57  
58  
59  
60

**Table 1 Key lessons learnt and potential solutions**

| Key findings                                                                                                                                                                               | Potential solutions                                                                                                                                                                                                                                                                         |
|--------------------------------------------------------------------------------------------------------------------------------------------------------------------------------------------|---------------------------------------------------------------------------------------------------------------------------------------------------------------------------------------------------------------------------------------------------------------------------------------------|
| <ul style="list-style-type: none"> <li>The structure put in place (alliancing) itself does not bring about joint working. Relationship building is essential.</li> </ul>                   | <ul style="list-style-type: none"> <li>Invest in nurturing and maintaining relationships between individuals and institutions.</li> </ul>                                                                                                                                                   |
| <ul style="list-style-type: none"> <li>An expectation of being able to deliver new models of care without provision of dedicated resources is false.</li> </ul>                            | <ul style="list-style-type: none"> <li>Ensure availability of adequate resourcing and develop agreement regarding the distribution of available resources.</li> </ul>                                                                                                                       |
| <ul style="list-style-type: none"> <li>A committed leadership to resourcing and joint working is important.</li> </ul>                                                                     | <ul style="list-style-type: none"> <li>Ensure a leadership who leads change by sharing common vision and goals, developing teamwork based on trust, relationship and open communication.</li> </ul>                                                                                         |
| <ul style="list-style-type: none"> <li>It is hard for project leaders to lead the strategic work on top of their day job.</li> </ul>                                                       | <ul style="list-style-type: none"> <li>Ensure a dedicated change agent maps out the implementation.</li> </ul>                                                                                                                                                                              |
| <ul style="list-style-type: none"> <li>Lack of detailed plan (clarity around roles and responsibilities and scope) and interdependencies made the implementation roadmap vague.</li> </ul> | <ul style="list-style-type: none"> <li>Acknowledge complexity and that transformation of this kind takes time.</li> <li>Develop a detailed and achievable implementation plan with a clear project management approach.</li> <li>Ensure robust staff and stakeholder engagement.</li> </ul> |
| <ul style="list-style-type: none"> <li>A robust feedback mechanism is needed for quality of implementation and to promote shared learning.</li> </ul>                                      | <ul style="list-style-type: none"> <li>Develop an overall quality improvement approach for the whole strategy and performance measurement framework to track the progress of strategy's objective.</li> </ul>                                                                               |

One key finding of this study is the importance of leadership – for successful local health system change a stable and committed senior leadership team working through high trust relationships and open communication across all partner

1  
2  
3 organisations is needed. Previous health system transformation initiatives in NZ and  
4  
5 internationally also offer valuable lessons relevant to integrated care through  
6  
7 alliancing.[13] It is noteworthy that while the alliancing approach in the NZ health  
8  
9 sector was initiated more than a decade ago[9, 13] the lessons from the Canterbury  
10  
11 initiative have not been fully realised across NZ. One reason for this is likely to be a  
12  
13 failure to contextualise the alliancing approach for different local health systems.[37]  
14  
15 Another is the possible ongoing influence of managerialism as a guiding principle for  
16  
17 organisation. This influence may be to the detriment of leadership development,  
18  
19 especially clinical leadership, which has been shown to be beneficial for health care  
20  
21 organisations and developing new models of care.[43, 44]  
22  
23  
24  
25

26  
27 The NZ government's health sector reforms, enacted in mid-2022, focus on  
28  
29 addressing the problems the health system is facing, including service  
30  
31 fragmentation.[7] The reforms emphasise the need for better integration between  
32  
33 primary and secondary care.[7] The reforms create a single national health service  
34  
35 through a new structure called Health New Zealand and have a greater emphasis on  
36  
37 working with local communities through geographical locality networks with aims of  
38  
39 integrating primary and secondary care.[7, 45-47] Alliance South had been in  
40  
41 abeyance since the announcement of the new health system reforms in April  
42  
43 2021[46] and, at the time of writing, the details of the structure of governance and  
44  
45 service delivery at the local level were in development. Regardless of the new  
46  
47 configuration of the NZ health system, we consider that the lessons learned from this  
48  
49 implementation evaluation will be instrumental for planning and implementing future  
50  
51 initiatives at the local level.  
52  
53  
54  
55  
56  
57  
58  
59  
60

## CONCLUSION

Using the CFIR, this study identified factors for the successful implementation of the PCSS using an alliancing approach in Southern NZ. During the evaluation period, wide-ranging health sector reforms in NZ were announced. Those leading the reforms should consider the key lessons from this study – in particular the importance of a stable and committed senior leadership team working through high trust relationships and open communication across all partner organisations - to strengthen integrated primary and community care delivery, which are core reform goals.

*Word count: 5047*

## SUPPLEMENTARY FILES

Supplementary File 1: Interview Topic guide (.pdf)

Supplementary File 2: COREQ-32 reporting checklist. (.pdf)

Supplementary File 3: CFIR constructs mapped by study participant (.pdf)

## ACKNOWLEDGEMENTS

The authors would like to thank the participants who gave their time for interviews. We are particularly grateful to the Southern Primary and Community Care Strategy Evaluation Steering Group (Chair, Dr Carol Atmore) for their support. We also thank Lisa Gestro, Executive Director Strategy, Primary & Community, Southern DHB for her input during proposal development.

## **ETHICS APPROVAL**

Ethics approval was obtained from the University of Otago's Human Ethics Committee (D21/044).

## **FUNDING**

This study was funded by Health Research South (<https://www.otago.ac.nz/oms/research/hrs/>) (2018 Health Service Delivery Research Grant; "Evaluating the Implementation of the Southern Primary Care and Community Care Strategy" Award/Grant number: N/A).

## **CONTRIBUTORSHIP STATEMENT**

TS, CJ and GG conceived and designed the study. GG conducted interviews and led the data analysis with input from TS, CJ and RG. GG, TS and CJ drafted the manuscript. All authors read, provided critical reviews and approved the final manuscript. TS is the guarantor.

## **COMPETING INTERESTS**

All authors declare that they have no competing interests.

## **DATA SHARING STATEMENT**

Full de-identified interview transcripts will not be shared. Informed consent, in line with the approving ethics committee, only allows for the use of de-identified extracts within research reporting and writing to maintain participants' privacy based in a defined regional area and population, thus making their identification with full transcripts more likely.

## REFERENCES

1. Cumming J, Middleton L, Silwal P, Tenbensen T: Integrated Care in Aotearoa New Zealand 2008–2020. *International Journal of Integrated Care* 2021, 21(4).
2. National Health Board: Trends in service design and new models of care: a review. National Health Board Wellington; 2010.
3. Robertson R, Sonola L, Honeyman M, Brooke B, Kothari S: Specialists in out-of-hospital settings. London: The King's Fund; 2014.
4. Minister of Health: New Zealand Health Strategy: future direction. In. Wellington: Ministry of Health; 2016.
5. Cumming J, McDonald J, Barr C, Martin G, Gerring Z, Daubé J: New Zealand health system review. Manila: WHO Regional Office for the Western Pacific; 2014.
6. Cumming J, Dunn P, Middleton L, O'Loughlin C: The health care home in New Zealand: rolling out a new model of primary health care. *Journal of Integrated Care* 2018, 26:242-252.
7. Health and Disability System Review: Health and disability system review - final report– Pūrongo Whakamutunga. Wellington: HDSR; 2020.
8. Akmal A, Gauld R: What components are important for effective healthcare alliance governance? findings from a modified Delphi study in New Zealand. *Health Policy* 2021, 125(2):239-245.
9. Gauld R: What should governance for integrated care look like? New Zealand's alliances provide some pointers. *Med J Aust* 2014, 201(3 Suppl):S67-68.
10. Tenbensen T, Silwal PR, Walton L, Ayeleke RO: New Zealand's integration-based policy for driving local health system improvement—which conditions underpin more successful implementation? *International Journal of Integrated Care* 2021, 21(2).
11. Gauld R: The theory and practice of integrative health care governance. *Journal of Integrated Care* 2017, 25(1):61-72.
12. Addicott R: Commissioning and contracting for integrated care. London: The King's Fund; 2014.
13. Timmins N, Ham C: The quest for integrated health and social care: a case study in Canterbury, New Zealand. London: The King's Fund; 2013.
14. Maniatopoulos G, Hunter DJ, Erskine J, Hudson B: Lessons learnt from the implementation of new care models in the NHS: a qualitative study of the North East Vanguard programme. *BMJ open* 2019, 9(11):e032107.
15. Starling A, Foundation H: Implementing new models of care: lessons from the new care models programme in England. *International journal of care coordination* 2018, 21(1-2):50-54.
16. Alderwick H, Shortell SM, Briggs AD, Fisher ES: Can accountable care organisations really improve the English NHS? Lessons from the United States. *BMJ* 2018, 360.
17. Southern District Health Board & WellSouth Primary Health Network: Southern Primary & Community care strategy. Dunedin: Southern District Health Board & WellSouth Primary Health Network; 2019.
18. Southern District Health Board & WellSouth Primary Health Network: Southern Primary & Community Care Action Plan. Dunedin: Southern District Health Board & WellSouth Primary Health Network; 2019.

19. Damschroder LJ, Aron DC, Keith RE, Kirsh SR, Alexander JA, Lowery JC: Fostering implementation of health services research findings into practice: a consolidated framework for advancing implementation science. *Implementation science* 2009, 4(1):50.
20. Kirk MA, Kelley C, Yankey N, Birken SA, Abadie B, Damschroder L: A systematic review of the use of the consolidated framework for implementation research. *Implementation Science* 2015, 11(1):1-13.
21. Kelly LM, Cordeiro M: Three principles of pragmatism for research on organizational processes. *Methodological Innovations* 2020, 13(2).
22. Halcomb EJ, Davidson PM: Is verbatim transcription of interview data always necessary? *Applied nursing research* 2006, 19(1):38-42.
23. Graham T, Alderson P, Stokes T: Managing conflicts of interest in the UK National Institute for Health and Care Excellence (NICE) clinical guidelines programme: qualitative study. *PLoS One* 2015, 10(3):e0122313.
24. Gale RC, Wu J, Erhardt T, Bounthavong M, Reardon CM, Damschroder LJ, Midboe AM: Comparison of rapid vs in-depth qualitative analytic methods from a process evaluation of academic detailing in the Veterans Health Administration. *Implementation Science* 2019, 14(1):11.
25. Nevedal AL, Reardon CM, Opra Widerquist MA, Jackson GL, Cutrona SL, White BS, Damschroder LJ: Rapid versus traditional qualitative analysis using the Consolidated Framework for Implementation Research (CFIR). *Implementation Science* 2021, 16(1):67.
26. Gale NK, Heath G, Cameron E, Rashid S, Redwood S: Using the framework method for the analysis of qualitative data in multi-disciplinary health research. *BMC Medical Research Methodology* 2013, 13(1):117.
27. Tong A, Sainsbury P, Craig J: Consolidated criteria for reporting qualitative research (COREQ): a 32-item checklist for interviews and focus groups. *International journal for quality in health care : journal of the International Society for Quality in Health Care* 2007, 19(6):349-357.
28. Weiner BJ, Belden CM, Bergmire DM, Johnston M: The meaning and measurement of implementation climate. *Implementation Science* 2011, 6(1):1-12.
29. Gurung G, Barson S, Haughey M, Stokes T: Health Care Home implementation in Otago and Southland: a qualitative evaluation. *Journal of Primary Health Care* 2022, 14(2):130-137.
30. Keith RE, Crosson JC, O'Malley AS, Crompton D, Taylor EF: Using the Consolidated Framework for Implementation Research (CFIR) to produce actionable findings: a rapid-cycle evaluation approach to improving implementation. *Implementation Science* 2017, 12(1):15.
31. Breimaier HE, Heckemann B, Halfens RJ, Lohrmann C: The Consolidated Framework for Implementation Research (CFIR): a useful theoretical framework for guiding and evaluating a guideline implementation process in a hospital-based nursing practice. *BMC nursing* 2015, 14(1):1-9.
32. Nixon G, Blattner K, Withington S, Miller R, Stokes T: Exploring the response to the COVID-19 pandemic at the rural hospital–base hospital interface: experiences of New Zealand rural hospital doctors. *The New Zealand Medical Journal (Online)* 2021, 134(1545):11-21.
33. Thompson DS, Fazio X, Kustra E, Patrick L, Stanley D: Scoping review of complexity theory in health services research. *BMC Health Services Research* 2016, 16(1):87.



- 1
  - 2
  - 3
  - 4
  - 5
  - 6
  - 7
  - 8
  - 9
  - 10
  - 11
  - 12
  - 13
  - 14
  - 15
  - 16
  - 17
  - 18
  - 19
  - 20
  - 21
  - 22
  - 23
  - 24
  - 25
  - 26
  - 27
  - 28
  - 29
  - 30
  - 31
  - 32
  - 33
  - 34
  - 35
  - 36
  - 37
  - 38
  - 39
  - 40
  - 41
  - 42
  - 43
  - 44
  - 45
  - 46
  - 47
  - 48
  - 49
  - 50
  - 51
  - 52
  - 53
  - 54
  - 55
  - 56
  - 57
  - 58
  - 59
  - 60
34. Yakovchenko V, McCullough MB, Smith JL, Gabrielian S, Byrne T, Bruzios KE, Koosis E, Smelson DA: Implementing a complex psychosocial intervention for unstably housed Veterans: A realist-informed evaluation case study. *Implementation Research and Practice* 2021, 2.
35. Pawson R, Tilley N, Tilley N: Realistic evaluation. London: Sage; 1997.
36. Hill JN, Locatelli SM, Bokhour BG, Fix GM, Solomon J, Mueller N, LaVela SL: Evaluating broad-scale system change using the Consolidated Framework for Implementation Research: challenges and strategies to overcome them. *BMC Research Notes* 2018, 11(1):560.
37. Stokes T, Tumilty E, Doolan-Noble F, Gaud R: HealthPathways implementation in a New Zealand health region: a qualitative study using the Consolidated Framework for Implementation Research. *BMJ open* 2018, 8(12):e025094.
38. Lovelock K, Martin G, Gaud R, MacRae J: Better, Sooner, More Convenient? The reality of pursuing greater integration between primary and secondary healthcare providers in New Zealand. *SAGE open medicine* 2017, 5.
39. Charles A: Developing accountable care systems: Lessons from Canterbury, New Zealand. London: The King's Fund; 2017.
40. Imison C, Curry N, Holder H, Castle-Clarke S, Nimmons D, Appleby J, Thorlby R, Lombardo S: Shifting the balance of care: great expectations. London: Nuffield Trust; 2017.
41. Erskine J, Hunter DJ, Small A, Hicks C, McGovern T, Lugsden E, Whitty P, Steen N, Eccles MP: Leadership and transformational change in healthcare organisations: a qualitative analysis of the North East Transformation System. *Health services management research* 2013, 26(1):29-37.
42. Checkland K, Coleman A, Croke S, Billings J, Mikelyte R, Macinnes J, Allen P: National evaluation of the Vanguard new care models programme: report of qualitative case studies: understanding system change. In. Manchester: University of Manchester; 2021.
43. Goodall AH: Physician-leaders and hospital performance: Is there an association? *Social Science & Medicine* 2011, 73(4):535-539.
44. Gaud R, Horsburgh S: Has the clinical governance development agenda stalled? Perceptions of New Zealand medical professionals in 2012 and 2017. *Health Policy* 2020, 124(2):183-188.
45. New Zealand Government. Pae Ora (Healthy Futures) Act 2022. Public Act 2022 No 30. Wellington; 2022.
46. Department of the Prime Minister and Cabinet. Our health and disability system: Building a stronger health and disability system that delivers for all New Zealanders. Wellington: Department of the Prime Minister and Cabinet; 2021.
47. Department of the Prime Minister and Cabinet: Factsheet – Pae Ora (Healthy Futures) Bill. Wellington: Department of the Prime Minister and Cabinet; 2022.



## Interview Topic Guide

- Brief introduction and thank you for your time
- Introduce self
- Highlight specific points from the information sheet:
  - o study details/aims
  - o confidentiality and procedure
- Explanations of the use of study data
- Consent to audio-record
- Collect written consent

### **Areas to explore with the alliance leadership team (ALT) members and service leads**

#### **1) Your role?**

Prompts:

- o What is your current role?
- o How long have you been working in your current role?
- o Your role in primary and community care strategy (PCCS) implementation?
- o Can you tell me how did you become involved with the PCCS?
- o Is there a specific initiative (e.g. individual workstreams) that you are involved with?

#### **2) Understanding of PCCS**

Prompts:

- o What do PCCS initiatives mean to you?
- o What were your expectations of the PCCS initiatives?

#### **3) Governance structure and decision making**

- o What has been your experience of working in/with ALT?
- o How are the two organisations—SDHB and WellSouth PHO—working jointly for PCCS implementation?
- o What is the structure of communication and decision making?
- o How well has the vision and goal of PCCS been communicated to frontline staff?
- o Overall, what is working well, and what is not?

#### **4) Implementation of PCCS**

What are the key areas of focus of PCCS at the governance level?

Prompts:

- How are the supporting activities (enabling structure) implemented to help the implementation of individual workstreams/care models?
- How is ALT supporting the implementation of individual workstreams/care models?
- How satisfied are you with the PCCS implementation process? Please describe.
- What are the good and less good things about the PCCS roll-out process?
- How confident you are that the vision of the PCCS will be realised?
- How are the individual workstreams related?
- What are the impacts of Covid-19 on the implementation of the strategy?
- Overall, what is working well, and what is not?

### **5) Equity**

- What has been done for Māori and other high need groups as part of the strategy implementation?
- How is the governance/ALT team monitoring progress towards equity in PCCS goals and outcomes?

### **6) What do you see as the benefit of the PCSS intervention? Please explain.**

Prompts:

- Could you tell me how you think the PCCS has made a difference in coordination and integration?
- What roles did PCCS play in improving patient experience and equity in outcomes? How?
- To what extent do you think the above changes are the result of actions taken through the strategy?

### **7) Next step**

- Overall, what do you think of the PCCS?
- What should future PCCS initiatives do differently?
- How could the implementation aspects be improved?

### **Conclusion**

Is there anything more you would like to add? Thank you so much for your participation in the interview. Your opinions are very valuable to the study.

## Supplementary File 2

### Consolidated criteria for Reporting Qualitative research (COREQ) 32 item Checklist

Tong A, Sainsbury P, Craig J. Consolidated criteria for reporting qualitative research (COREQ): a 32-item checklist for interviews and focus groups. *International journal for quality in health care* 2007;19(6):349-57.

| Domain                                         | Item number | Comment                                                                                                                                                                                                                                                                | Reported on page number or not applicable (N/A) |
|------------------------------------------------|-------------|------------------------------------------------------------------------------------------------------------------------------------------------------------------------------------------------------------------------------------------------------------------------|-------------------------------------------------|
| <b>Domain 1: Research team and reflexivity</b> |             |                                                                                                                                                                                                                                                                        |                                                 |
| Personal Characteristics                       |             |                                                                                                                                                                                                                                                                        |                                                 |
| Interviewer/facilitator                        | 1           | The Research Fellow (Dr Gagan Gurung) conducted the interviews.                                                                                                                                                                                                        | 7                                               |
| Credentials                                    | 2           | All four research team members have PhD.                                                                                                                                                                                                                               | N/A                                             |
| Occupation                                     | 3           | GG – Research fellow, CJ – Associate professor, RG – professor, TS – professor.                                                                                                                                                                                        | 1                                               |
| Gender                                         | 4           | Three male-identifying and one female-identifying researchers (interviewer, male-identifying).                                                                                                                                                                         | N/A                                             |
| Experience and training                        | 5           | All four research team members have extensive experience in conducting qualitative health research.                                                                                                                                                                    | N/A                                             |
| Relationship with participants                 |             |                                                                                                                                                                                                                                                                        |                                                 |
| Relationship established                       | 6           | It was a collaborative research project between the University and the local health system. Therefore, the research fellow and the broader research team knew some of the participants prior to the research. GG had not met with six participants prior to the study. | N/A                                             |
| Participant knowledge of the interviewer       | 7           | The interviewer introduced himself to participants stating he was a health services researcher, described the research team, its funding, the purpose of the project and answered any questions                                                                        | N/A                                             |

|                                        |    |                                                                                                                                                                              |                      |
|----------------------------------------|----|------------------------------------------------------------------------------------------------------------------------------------------------------------------------------|----------------------|
|                                        |    | participants may have had about the project and those involved in it.                                                                                                        |                      |
| Interviewer characteristics            | 8  | The interviewer was aware of the health system in New Zealand.                                                                                                               | N/A                  |
| <b>Domain 2: study design</b>          |    |                                                                                                                                                                              |                      |
| Theoretical framework                  |    |                                                                                                                                                                              |                      |
| Methodological orientation and Theory  | 9  | Pragmatic orientation/paradigm<br>Rapid framework-guided analysis using the CFIR.                                                                                            | 7                    |
| Participant selection                  |    |                                                                                                                                                                              |                      |
| Sampling                               | 10 | Purposive sampling was used.                                                                                                                                                 | 7                    |
| Method of approach                     | 11 | Participants were approached by email.                                                                                                                                       | N/A                  |
| Sample size                            | 12 | Eleven.                                                                                                                                                                      | 8                    |
| Non-participation                      | 13 | Two key informants did not respond to the invitation to participate, however, no person directly declined to take part, nor did anybody drop out once agreeing to take part. | NA                   |
| Setting                                |    |                                                                                                                                                                              |                      |
| Setting of data collection             | 14 | Participants could determine where the interview took place. Nine interviews were conducted by Zoom and two in person in their office.                                       | N/A                  |
| Presence of non-participants           | 15 | None.                                                                                                                                                                        | N/A                  |
| Description of sample                  | 16 | Fully described in the results section.                                                                                                                                      | 8                    |
| Data collection                        |    |                                                                                                                                                                              |                      |
| Interview guide                        | 17 | The interview guide had a number of key questions and potential prompts.                                                                                                     | Supplementary file 1 |
| Repeat interviews                      | 18 | No.                                                                                                                                                                          | NA                   |
| Audio/visual recording                 | 19 | All interviews were audio-recorded.                                                                                                                                          | 7                    |
| Field notes                            | 20 | Yes, following each interview, the interviewer wrote brief field notes covering the participants' main ideas and the interviewer's reflections.                              | 7                    |
| Duration                               | 21 | Interview times varied between 30 to 45 mins.                                                                                                                                | 7                    |
| Data saturation                        | 22 | Not applicable.                                                                                                                                                              | NA                   |
| Transcripts returned                   | 23 | No.                                                                                                                                                                          | NA                   |
| <b>Domain 3: analysis and findings</b> |    |                                                                                                                                                                              |                      |

|                                |    |                                                                                                                                                                                                       |      |
|--------------------------------|----|-------------------------------------------------------------------------------------------------------------------------------------------------------------------------------------------------------|------|
| Data analysis                  |    |                                                                                                                                                                                                       |      |
| Number of data coders          | 24 | The interviewer coded the data and codes were discussed regularly with all members of the interview team.                                                                                             | 7    |
| Description of the coding tree | 25 | No. However, coding was informed by research questions, interview guides and CFIR.                                                                                                                    | 7    |
| Derivation of themes           | 26 | The themes were derived from CFIR.                                                                                                                                                                    | 7    |
| Software                       | 27 | We did not use software to manage data. We used MS word and an excel spreadsheet for coding and analysis.                                                                                             | 7    |
| Participant checking           | 28 | No formal member checking or respondent validation was carried out. We did, however, share our preliminary findings in periodic colloquiums targeted to participants from the Southern health system. | NA   |
| Reporting                      |    |                                                                                                                                                                                                       |      |
| Quotations presented           | 29 | Yes. Quotations are presented to illustrate findings and identified in a manner protecting participants' confidentiality.                                                                             | 8-19 |
|                                |    |                                                                                                                                                                                                       |      |
| Data and findings consistent   | 30 | There was consistency between the data and the findings.                                                                                                                                              | 8-19 |
| Clarity of major themes        | 31 | Yes, there is clarity of major themes.                                                                                                                                                                |      |
| Clarity of minor themes        | 32 | Yes, minor themes (CFIR constructs) are clearly identified, and they are related to major themes.                                                                                                     | 8-19 |

1  
2  
3  
4  
5  
6  
7  
8  
9  
10  
11  
12  
13  
14  
15  
16  
17  
18  
19  
20  
21  
22  
23  
24  
25  
26  
27  
28  
29  
30  
31  
32  
33  
34  
35  
36  
37  
38  
39  
40  
41  
42  
43  
44  
45  
46

| Construct                       |                             | CFIR Description                                                                                                                                | Participants |   |   |   |   |   |   |   |   |    |    | Frequency of codes |
|---------------------------------|-----------------------------|-------------------------------------------------------------------------------------------------------------------------------------------------|--------------|---|---|---|---|---|---|---|---|----|----|--------------------|
| I. INTERVENTION CHARACTERISTICS |                             |                                                                                                                                                 | 1            | 2 | 3 | 4 | 5 | 6 | 7 | 8 | 9 | 10 | 11 |                    |
| A                               | Intervention Source         | Perception of key stakeholders about whether the intervention is externally or internally developed.                                            |              |   |   |   |   |   |   |   |   |    |    |                    |
| B                               | Evidence Strength & Quality | Stakeholders' perceptions of the quality and validity of evidence supporting the belief that the intervention will have desired outcomes.       |              |   |   |   |   |   |   |   |   |    |    |                    |
| C                               | Relative Advantage          | Stakeholders' perception of the advantage of implementing the intervention versus an alternative solution.                                      |              |   |   |   |   |   |   |   |   |    |    |                    |
| D                               | Adaptability                | The degree to which an intervention can be adapted, tailored, refined, or reinvented to meet local needs.                                       |              |   |   |   |   |   |   |   |   |    |    |                    |
| E                               | Trialability                | The ability to test the intervention on a small scale in the organization, and to be able to reverse course (undo implementation) if warranted. |              |   |   |   |   |   |   |   |   |    |    |                    |

|                          |                            |                                                                                                                                                                         |   |   |  |  |   |   |  |  |   |   |  |   |
|--------------------------|----------------------------|-------------------------------------------------------------------------------------------------------------------------------------------------------------------------|---|---|--|--|---|---|--|--|---|---|--|---|
| F                        | Complexity                 | Perceived difficulty of implementation, reflected by duration, scope, radicalness, disruptiveness, centrality, and intricacy and number of steps required to implement. | x | x |  |  | x | x |  |  | x | x |  | 6 |
| G                        | Design Quality & Packaging | Perceived excellence in how the intervention is bundled, presented, and assembled.                                                                                      |   |   |  |  |   |   |  |  |   |   |  |   |
| H                        | Cost                       | Costs of the intervention and costs associated with implementing the intervention including investment, supply, and opportunity costs.                                  |   |   |  |  |   |   |  |  |   |   |  |   |
| <b>II. OUTER SETTING</b> |                            |                                                                                                                                                                         |   |   |  |  |   |   |  |  |   |   |  |   |
| A                        | Patient Needs & Resources  | The extent to which patient needs, as well as barriers and facilitators to meet those needs, are accurately known and prioritized by the organization.                  |   |   |  |  |   |   |  |  |   |   |  |   |
| B                        | Cosmopolitanism            | The degree to which an organization is networked with other external organizations.                                                                                     |   |   |  |  |   |   |  |  |   |   |  |   |
| C                        | Peer Pressure              | Mimetic or competitive pressure to implement an intervention; typically because most or other key peer or competing                                                     |   |   |  |  |   |   |  |  |   |   |  |   |





|         |                                     |                                                                                                                                                                                                                                                                    |   |   |  |  |  |   |   |  |  |  |  |   |
|---------|-------------------------------------|--------------------------------------------------------------------------------------------------------------------------------------------------------------------------------------------------------------------------------------------------------------------|---|---|--|--|--|---|---|--|--|--|--|---|
| D       | Implementation Climate              | The absorptive capacity for change, shared receptivity of involved individuals to an intervention, and the extent to which use of that intervention will be rewarded, supported, and expected within their organization.                                           |   |   |  |  |  |   |   |  |  |  |  |   |
| 1       | Tension for Change                  | The degree to which stakeholders perceive the current situation as intolerable or needing change.                                                                                                                                                                  |   |   |  |  |  |   |   |  |  |  |  |   |
| 2       | Compatibility                       | The degree of tangible fit between meaning and values attached to the intervention by involved individuals, how those align with individuals' own norms, values, and perceived risks and needs, and how the intervention fits with existing workflows and systems. |   |   |  |  |  | x | x |  |  |  |  | 2 |
| 3+25:41 | Relative Priority                   | Individuals' shared perception of the importance of the implementation within the organization.                                                                                                                                                                    | x | x |  |  |  |   |   |  |  |  |  | 2 |
| 4       | Organizational Incentives & Rewards | Extrinsic incentives such as goal-sharing awards, performance reviews, promotions, and raises in salary, and less tangible                                                                                                                                         |   |   |  |  |  |   |   |  |  |  |  |   |

1  
2  
3  
4  
5  
6  
7  
8  
9  
10  
11  
12  
13  
14  
15  
16  
17  
18  
19  
20  
21  
22  
23  
24  
25  
26  
27  
28  
29  
30  
31  
32  
33  
34  
35  
36  
37  
38  
39  
40  
41  
42  
43  
44  
45  
46

|   |                              |                                                                                                                                                                                                                                                                                                                                                                      |  |  |  |  |  |  |  |  |  |  |  |  |  |  |  |  |  |
|---|------------------------------|----------------------------------------------------------------------------------------------------------------------------------------------------------------------------------------------------------------------------------------------------------------------------------------------------------------------------------------------------------------------|--|--|--|--|--|--|--|--|--|--|--|--|--|--|--|--|--|
|   |                              | incentives such as increased stature or respect.                                                                                                                                                                                                                                                                                                                     |  |  |  |  |  |  |  |  |  |  |  |  |  |  |  |  |  |
| 5 | Goals and Feedback           | The degree to which goals are clearly communicated, acted upon, and fed back to staff, and alignment of that feedback with goals.                                                                                                                                                                                                                                    |  |  |  |  |  |  |  |  |  |  |  |  |  |  |  |  |  |
| 6 | Learning Climate             | A climate in which: a) leaders express their own fallibility and need for team members' assistance and input; b) team members feel that they are essential, valued, and knowledgeable partners in the change process; c) individuals feel psychologically safe to try new methods; and d) there is sufficient time and space for reflective thinking and evaluation. |  |  |  |  |  |  |  |  |  |  |  |  |  |  |  |  |  |
| E | Readiness for Implementation | Tangible and immediate indicators of organizational commitment to its decision to implement an intervention.                                                                                                                                                                                                                                                         |  |  |  |  |  |  |  |  |  |  |  |  |  |  |  |  |  |

|                                           |                                   |                                                                                                                                              |   |   |   |   |   |   |   |   |  |   |   |   |
|-------------------------------------------|-----------------------------------|----------------------------------------------------------------------------------------------------------------------------------------------|---|---|---|---|---|---|---|---|--|---|---|---|
| 1                                         | Leadership Engagement             | Commitment, involvement, and accountability of leaders and managers with the implementation.                                                 | x | x | x |   |   | x | x | x |  | x | x | 8 |
|                                           |                                   |                                                                                                                                              |   |   | x |   |   | x | x |   |  | x | x | 5 |
| 2                                         | Available Resources               | The level of resources dedicated for implementation and on-going operations, including money, training, education, physical space, and time. | x | x | x | x | x | x | x | x |  | x | x | 9 |
|                                           |                                   |                                                                                                                                              | x |   | x | x | x |   |   | x |  |   | x | 6 |
| 3                                         | Access to Knowledge & Information | Ease of access to digestible information and knowledge about the intervention and how to incorporate it into work tasks.                     |   |   |   |   |   |   |   |   |  |   |   |   |
| <b>IV. CHARACTERISTICS OF INDIVIDUALS</b> |                                   |                                                                                                                                              |   |   |   |   |   |   |   |   |  |   |   |   |

1  
2  
3  
4  
5  
6  
7  
8  
9  
10  
11  
12  
13  
14  
15  
16  
17  
18  
19  
20  
21  
22  
23  
24  
25  
26  
27  
28  
29  
30  
31  
32  
33  
34  
35  
36  
37  
38  
39  
40  
41  
42  
43  
44  
45  
46

|                   |                                             |                                                                                                                                                                        |  |  |  |  |  |  |  |  |  |  |  |  |  |  |  |
|-------------------|---------------------------------------------|------------------------------------------------------------------------------------------------------------------------------------------------------------------------|--|--|--|--|--|--|--|--|--|--|--|--|--|--|--|
| A                 | Knowledge & Beliefs about the Intervention  | Individuals' attitudes toward and value placed on the intervention as well as familiarity with facts, truths, and principles related to the intervention.              |  |  |  |  |  |  |  |  |  |  |  |  |  |  |  |
| B                 | Self-efficacy                               | Individual belief in their own capabilities to execute courses of action to achieve implementation goals.                                                              |  |  |  |  |  |  |  |  |  |  |  |  |  |  |  |
| C                 | Individual Stage of Change                  | Characterization of the phase an individual is in, as he or she progresses toward skilled, enthusiastic, and sustained use of the intervention.                        |  |  |  |  |  |  |  |  |  |  |  |  |  |  |  |
| D                 | Individual Identification with Organization | A broad construct related to how individuals perceive the organization, and their relationship and degree of commitment with that organization.                        |  |  |  |  |  |  |  |  |  |  |  |  |  |  |  |
| E                 | Other Personal Attributes                   | A broad construct to include other personal traits such as tolerance of ambiguity, intellectual ability, motivation, values, competence, capacity, and learning style. |  |  |  |  |  |  |  |  |  |  |  |  |  |  |  |
| <b>V. PROCESS</b> |                                             |                                                                                                                                                                        |  |  |  |  |  |  |  |  |  |  |  |  |  |  |  |

|                                                                   |   |                                                    |                                                                                                                                                                                                                       |   |   |   |   |   |   |   |  |  |   |  |   |
|-------------------------------------------------------------------|---|----------------------------------------------------|-----------------------------------------------------------------------------------------------------------------------------------------------------------------------------------------------------------------------|---|---|---|---|---|---|---|--|--|---|--|---|
| 1<br>2<br>3<br>4<br>5<br>6<br>7<br>8<br>9<br>10<br>11<br>12<br>13 | A | Planning                                           | The degree to which a scheme or method of behavior and tasks for implementing an intervention are developed in advance, and the quality of those schemes or methods.                                                  | x | x | x | x | x |   | x |  |  | x |  | 7 |
| 14<br>15<br>16<br>17<br>18<br>19<br>20<br>21<br>22                | B | Engaging                                           | Attracting and involving appropriate individuals in the implementation and use of the intervention through a combined strategy of social marketing, education, role modeling, training, and other similar activities. |   | x |   | x | x | x |   |  |  | x |  | 5 |
| 23<br>24<br>25<br>26<br>27<br>28<br>29                            | 1 | Opinion Leaders                                    | Individuals in an organization who have formal or informal influence on the attitudes and beliefs of their colleagues with respect to implementing the intervention.                                                  |   |   |   |   |   |   |   |  |  |   |  |   |
| 30<br>31<br>32<br>33<br>34<br>35<br>36<br>37<br>38                | 2 | Formally Appointed Internal Implementation Leaders | Individuals from within the organization who have been formally appointed with responsibility for implementing an intervention as coordinator, project manager, team leader, or other similar role.                   |   |   |   |   |   |   |   |  |  |   |  |   |

1  
2  
3  
4  
5  
6  
7  
8  
9  
10  
11  
12  
13  
14  
15  
16  
17  
18  
19  
20  
21  
22  
23  
24  
25  
26  
27  
28  
29  
30  
31  
32  
33  
34  
35  
36  
37  
38  
39  
40  
41  
42  
43  
44  
45  
46

|   |                         |                                                                                                                                                                                                                       |   |   |  |   |  |  |   |   |   |  |   |  |  |   |
|---|-------------------------|-----------------------------------------------------------------------------------------------------------------------------------------------------------------------------------------------------------------------|---|---|--|---|--|--|---|---|---|--|---|--|--|---|
| 3 | Champions               | “Individuals who dedicate themselves to supporting, marketing, and ‘driving through’ an [implementation]” [101] (p. 182), overcoming indifference or resistance that the intervention may provoke in an organization. |   |   |  |   |  |  |   |   |   |  |   |  |  |   |
| 4 | External Change Agents  | Individuals who are affiliated with an outside entity who formally influence or facilitate intervention decisions in a desirable direction.                                                                           |   |   |  |   |  |  |   |   |   |  |   |  |  |   |
| C | Executing               | Carrying out or accomplishing the implementation according to plan.                                                                                                                                                   | x | x |  | x |  |  | x | x | x |  |   |  |  | 6 |
| D | Reflecting & Evaluating | Quantitative and qualitative feedback about the progress and quality of implementation accompanied with regular personal and team debriefing about progress and experience.                                           | x | x |  | x |  |  | x |   |   |  | x |  |  | 5 |

|  |                     |  |   |   |   |  |   |   |   |  |  |  |  |   |   |
|--|---------------------|--|---|---|---|--|---|---|---|--|--|--|--|---|---|
|  | Perceived impact    |  | x | x |   |  | 5 |   |   |  |  |  |  |   | 3 |
|  | Equity              |  | x | x |   |  |   |   | x |  |  |  |  | x | 4 |
|  | Strategy and future |  | x |   | x |  |   | x | x |  |  |  |  |   | 4 |

For peer review only

1  
2  
3  
4  
5  
6  
7  
8  
9  
10  
11  
12  
13  
14  
15  
16  
17  
18  
19  
20  
21  
22  
23  
24  
25  
26  
27  
28  
29  
30  
31  
32  
33  
34  
35  
36  
37  
38  
39  
40  
41  
42  
43  
44  
45  
46
