# Supplementary material for: Lessons learnt from the implementation of new models of care delivery through alliance governance in the Southern health region of New Zealand: a qualitative study
Source: PubMed Central journal article supplement — BMJ Open. 2022 Oct 31;12(10):e065635. doi: 10.1136/bmjopen-2022-065635 (PMC9628683; doi:10.1136/bmjopen-2022-065635), 2022-10-31
Supplement: bmjopen-2022-065635supp002.pdf [file bmjopen-2022-065635supp002.pdf]

**Supplementary File 2****Consolidated criteria for Reporting Qualitative research (COREQ) 32 item Checklist**

Tong A, Sainsbury P, Craig J. Consolidated criteria for reporting qualitative research (COREQ): a 32-item checklist for interviews and focus groups. *International journal for quality in health care* 2007;19(6):349-57.

| Domain                                         | Item number | Comment                                                                                                                                                                                                                                                                | Reported on page number or not applicable (N/A) |
|------------------------------------------------|-------------|------------------------------------------------------------------------------------------------------------------------------------------------------------------------------------------------------------------------------------------------------------------------|-------------------------------------------------|
| <b>Domain 1: Research team and reflexivity</b> |             |                                                                                                                                                                                                                                                                        |                                                 |
| Personal Characteristics                       |             |                                                                                                                                                                                                                                                                        |                                                 |
| Interviewer/facilitator                        | 1           | The Research Fellow (Dr Gagan Gurung) conducted the interviews.                                                                                                                                                                                                        | 7                                               |
| Credentials                                    | 2           | All four research team members have PhD.                                                                                                                                                                                                                               | N/A                                             |
| Occupation                                     | 3           | GG – Research fellow, CJ – Associate professor, RG – professor, TS – professor.                                                                                                                                                                                        | 1                                               |
| Gender                                         | 4           | Three male-identifying and one female-identifying researchers (interviewer, male-identifying).                                                                                                                                                                         | N/A                                             |
| Experience and training                        | 5           | All four research team members have extensive experience in conducting qualitative health research.                                                                                                                                                                    | N/A                                             |
| Relationship with participants                 |             |                                                                                                                                                                                                                                                                        |                                                 |
| Relationship established                       | 6           | It was a collaborative research project between the University and the local health system. Therefore, the research fellow and the broader research team knew some of the participants prior to the research. GG had not met with six participants prior to the study. | N/A                                             |
| Participant knowledge of the interviewer       | 7           | The interviewer introduced himself to participants stating he was a health services researcher, described the research team, its funding, the purpose of the project and answered any questions                                                                        | N/A                                             |

|                                        |    |                                                                                                                                                                              |                      |
|----------------------------------------|----|------------------------------------------------------------------------------------------------------------------------------------------------------------------------------|----------------------|
|                                        |    | participants may have had about the project and those involved in it.                                                                                                        |                      |
| Interviewer characteristics            | 8  | The interviewer was aware of the health system in New Zealand.                                                                                                               | N/A                  |
| <b>Domain 2: study design</b>          |    |                                                                                                                                                                              |                      |
| Theoretical framework                  |    |                                                                                                                                                                              |                      |
| Methodological orientation and Theory  | 9  | Pragmatic orientation/paradigm<br>Rapid framework-guided analysis using the CFIR.                                                                                            | 7                    |
| Participant selection                  |    |                                                                                                                                                                              |                      |
| Sampling                               | 10 | Purposive sampling was used.                                                                                                                                                 | 7                    |
| Method of approach                     | 11 | Participants were approached by email.                                                                                                                                       | N/A                  |
| Sample size                            | 12 | Eleven.                                                                                                                                                                      | 8                    |
| Non-participation                      | 13 | Two key informants did not respond to the invitation to participate, however, no person directly declined to take part, nor did anybody drop out once agreeing to take part. | NA                   |
| Setting                                |    |                                                                                                                                                                              |                      |
| Setting of data collection             | 14 | Participants could determine where the interview took place. Nine interviews were conducted by Zoom and two in person in their office.                                       | N/A                  |
| Presence of non-participants           | 15 | None.                                                                                                                                                                        | N/A                  |
| Description of sample                  | 16 | Fully described in the results section.                                                                                                                                      | 8                    |
| Data collection                        |    |                                                                                                                                                                              |                      |
| Interview guide                        | 17 | The interview guide had a number of key questions and potential prompts.                                                                                                     | Supplementary file 1 |
| Repeat interviews                      | 18 | No.                                                                                                                                                                          | NA                   |
| Audio/visual recording                 | 19 | All interviews were audio-recorded.                                                                                                                                          | 7                    |
| Field notes                            | 20 | Yes, following each interview, the interviewer wrote brief field notes covering the participants' main ideas and the interviewer's reflections.                              | 7                    |
| Duration                               | 21 | Interview times varied between 30 to 45 mins.                                                                                                                                | 7                    |
| Data saturation                        | 22 | Not applicable.                                                                                                                                                              | NA                   |
| Transcripts returned                   | 23 | No.                                                                                                                                                                          | NA                   |
| <b>Domain 3: analysis and findings</b> |    |                                                                                                                                                                              |                      |

|                                |    |                                                                                                                                                                                                       |      |
|--------------------------------|----|-------------------------------------------------------------------------------------------------------------------------------------------------------------------------------------------------------|------|
| Data analysis                  |    |                                                                                                                                                                                                       |      |
| Number of data coders          | 24 | The interviewer coded the data and codes were discussed regularly with all members of the interview team.                                                                                             | 7    |
| Description of the coding tree | 25 | No. However, coding was informed by research questions, interview guides and CFIR.                                                                                                                    | 7    |
| Derivation of themes           | 26 | The themes were derived from CFIR.                                                                                                                                                                    | 7    |
| Software                       | 27 | We did not use software to manage data. We used MS word and an excel spreadsheet for coding and analysis.                                                                                             | 7    |
| Participant checking           | 28 | No formal member checking or respondent validation was carried out. We did, however, share our preliminary findings in periodic colloquiums targeted to participants from the Southern health system. | NA   |
| Reporting                      |    |                                                                                                                                                                                                       |      |
| Quotations presented           | 29 | Yes. Quotations are presented to illustrate findings and identified in a manner protecting participants' confidentiality.                                                                             | 8-19 |
|                                |    |                                                                                                                                                                                                       |      |
| Data and findings consistent   | 30 | There was consistency between the data and the findings.                                                                                                                                              | 8-19 |
| Clarity of major themes        | 31 | Yes, there is clarity of major themes.                                                                                                                                                                |      |
| Clarity of minor themes        | 32 | Yes, minor themes (CFIR constructs) are clearly identified, and they are related to major themes.                                                                                                     | 8-19 |
